# Supplementary figures and images for: Borderline metal-catalyzed carboarylation of alkynylarenes using N,O-acetals
Source: Royal Society of Chemistry journal article supplement (doi:10.1039/c2cc32715e), 2012-01-01

**3aa**

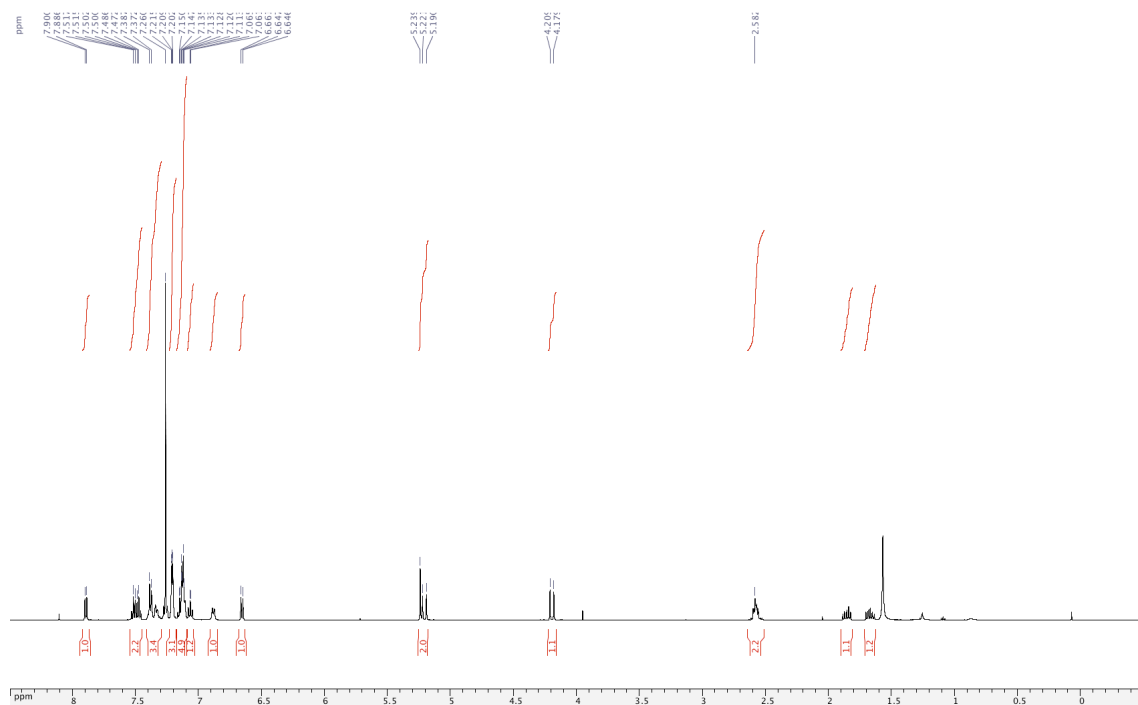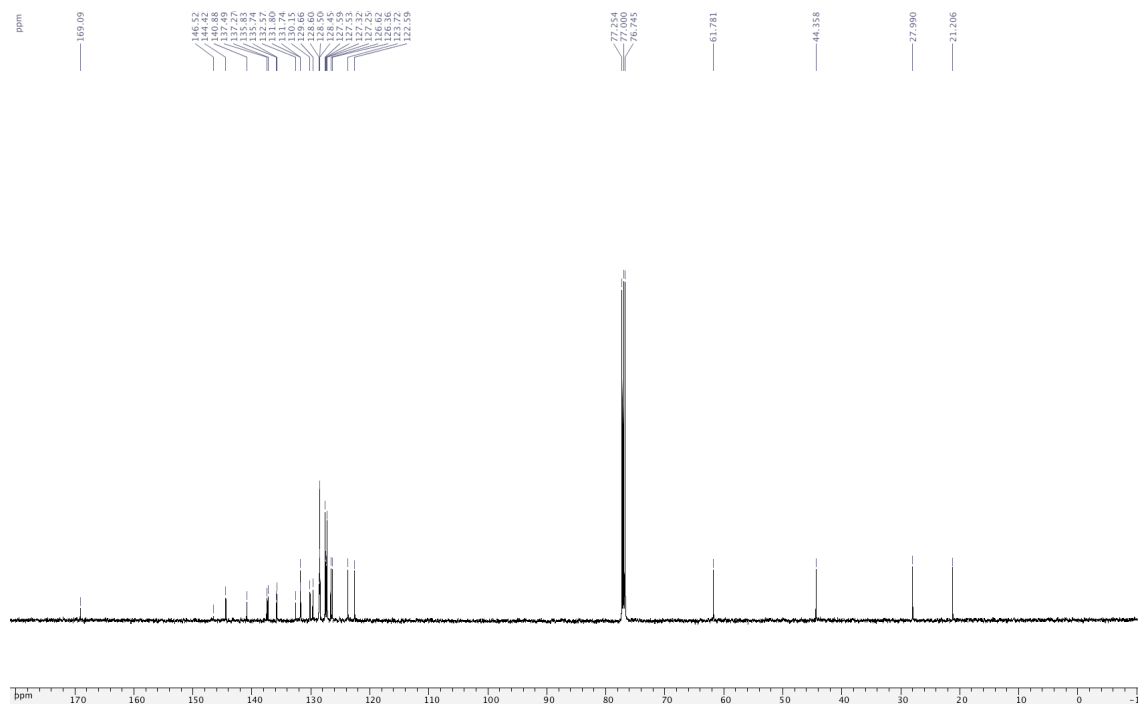





### 3da

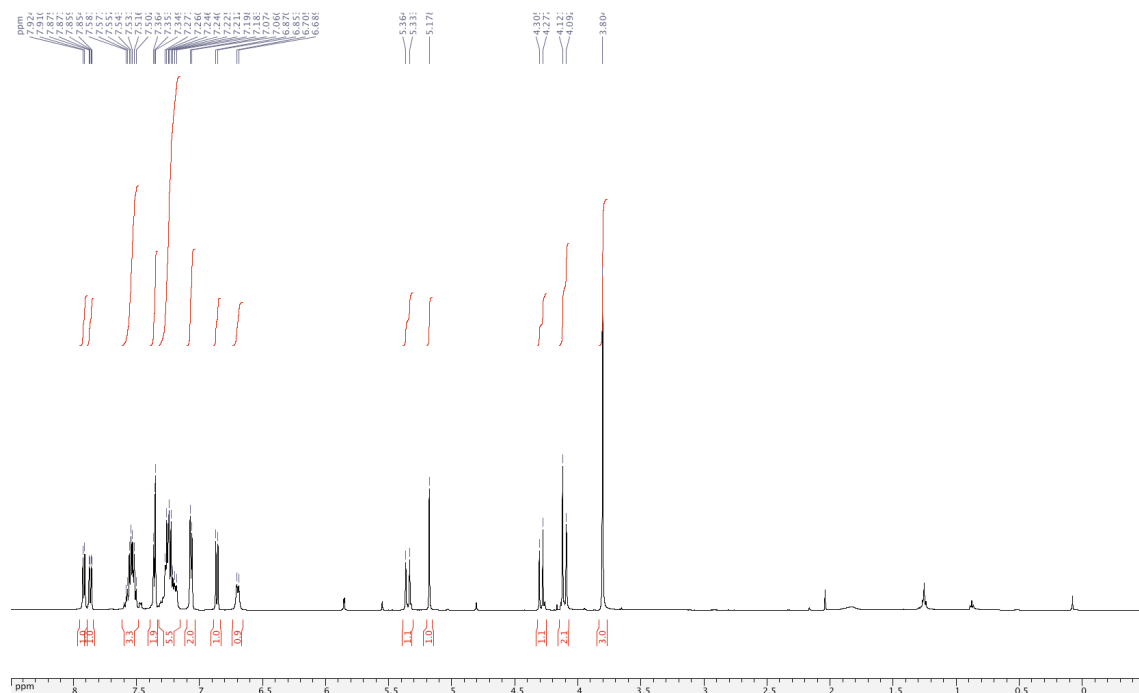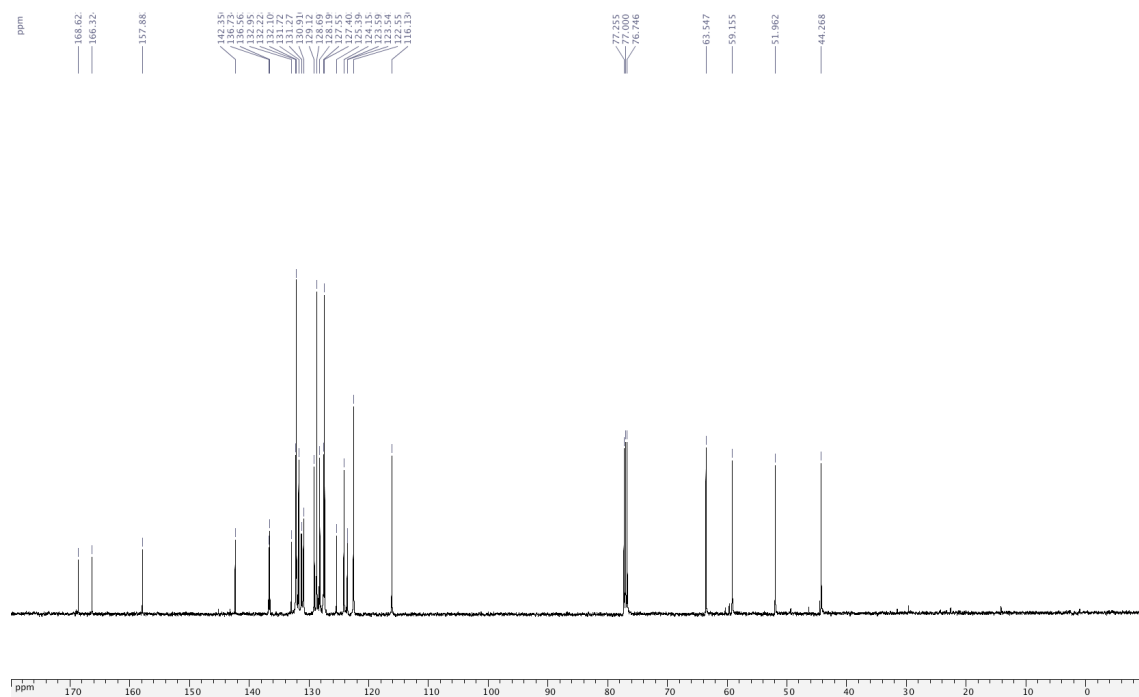





3ga

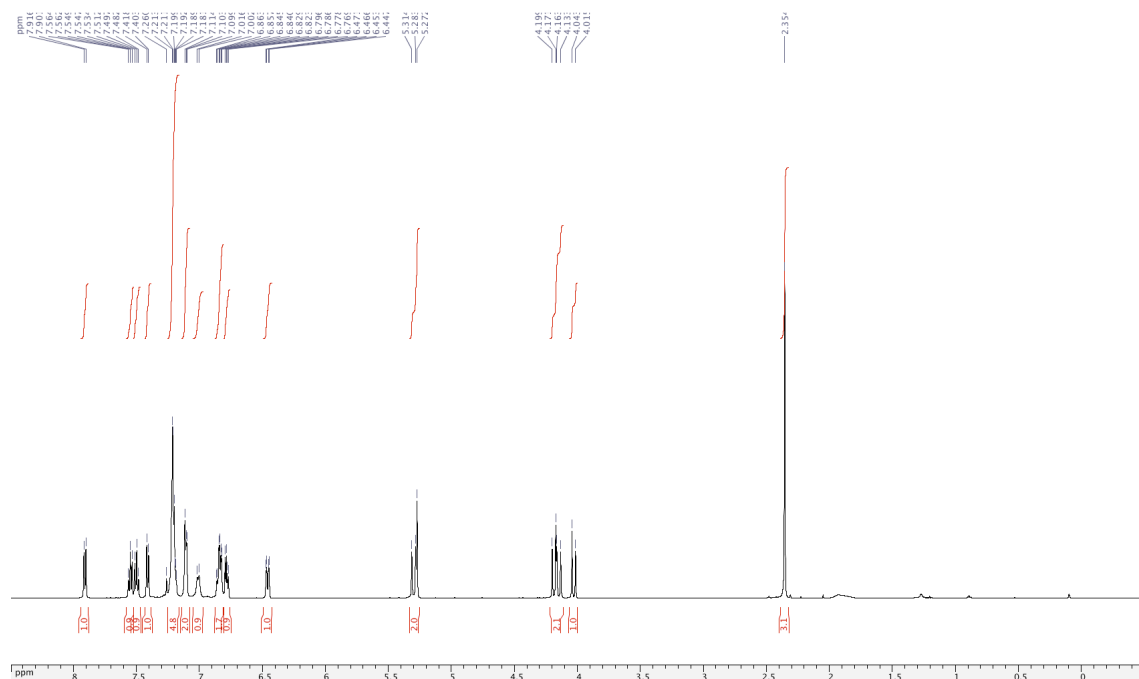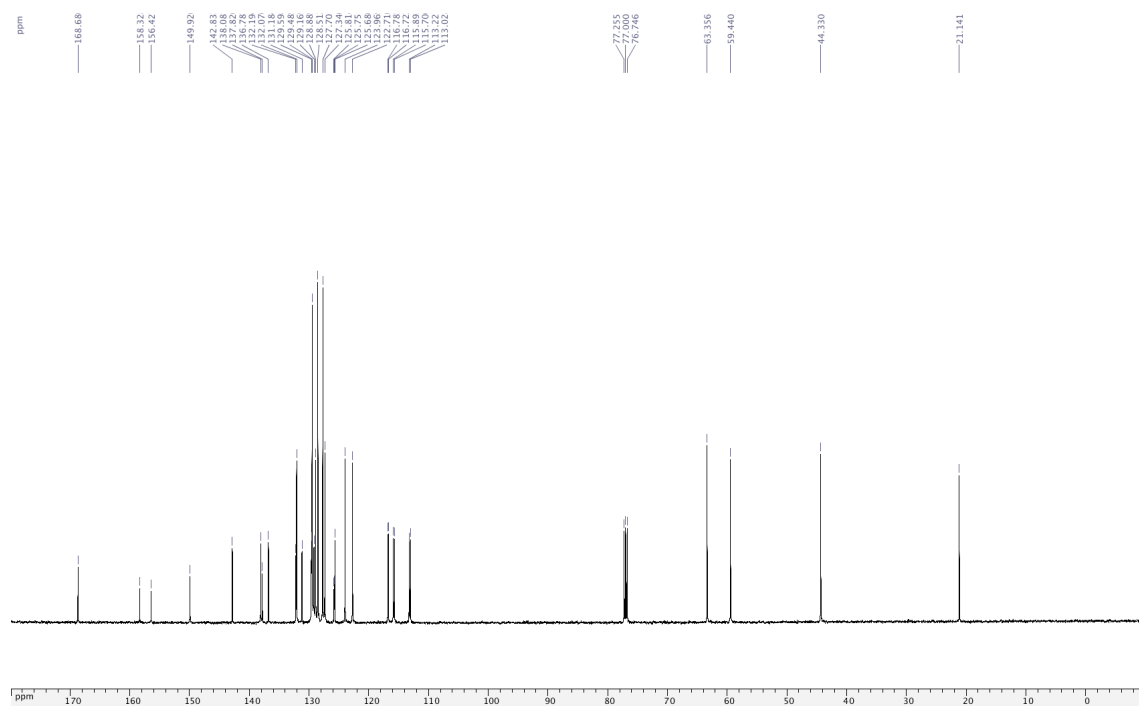

### 3ha

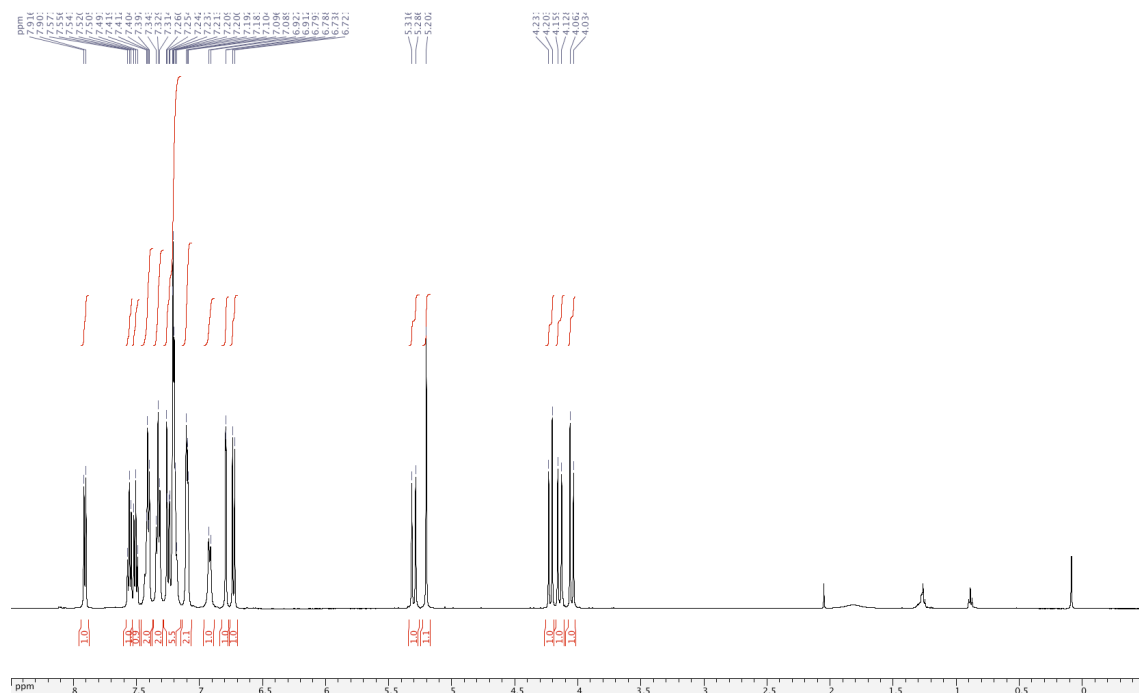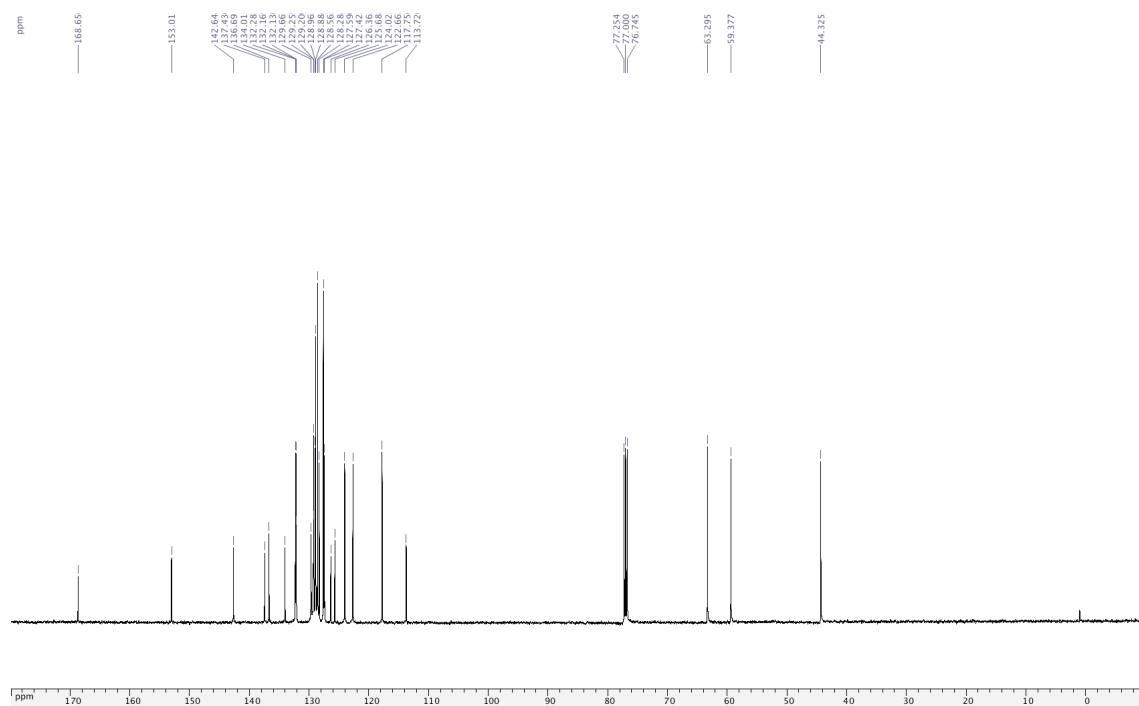



**3ia**

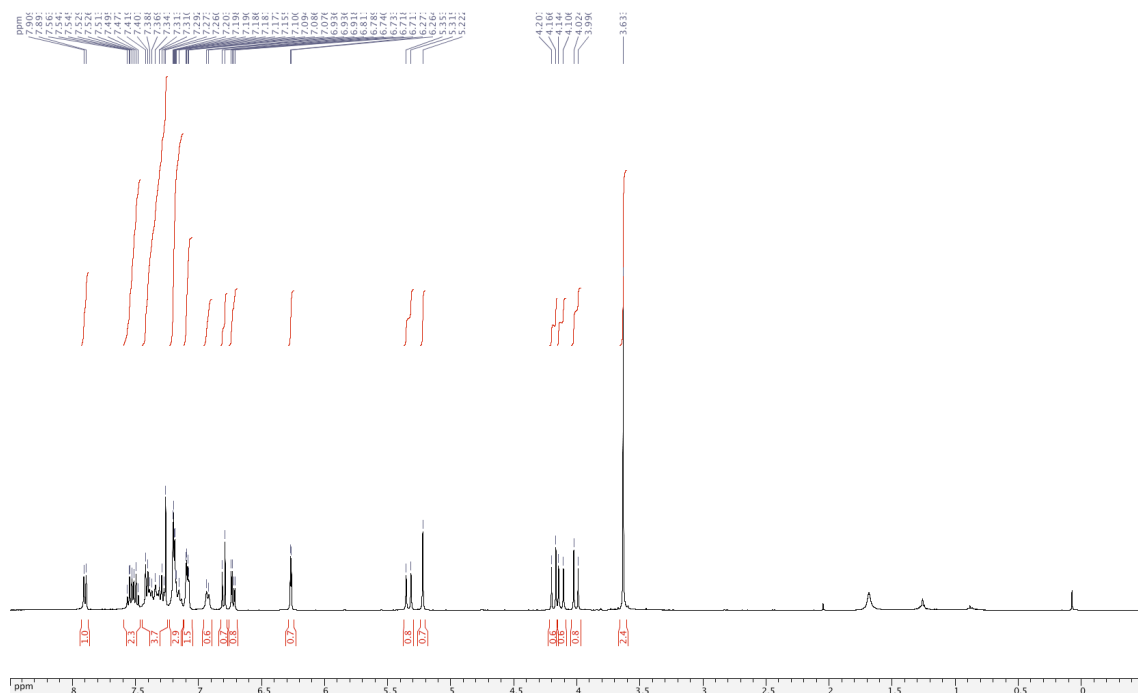





### 31a

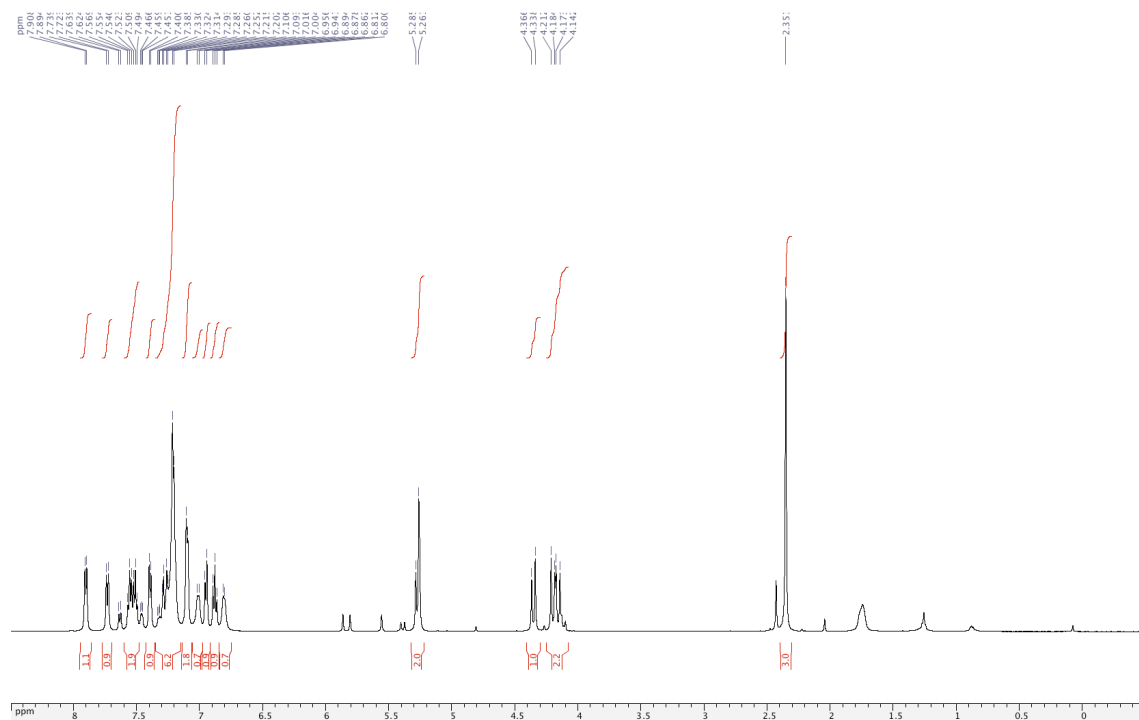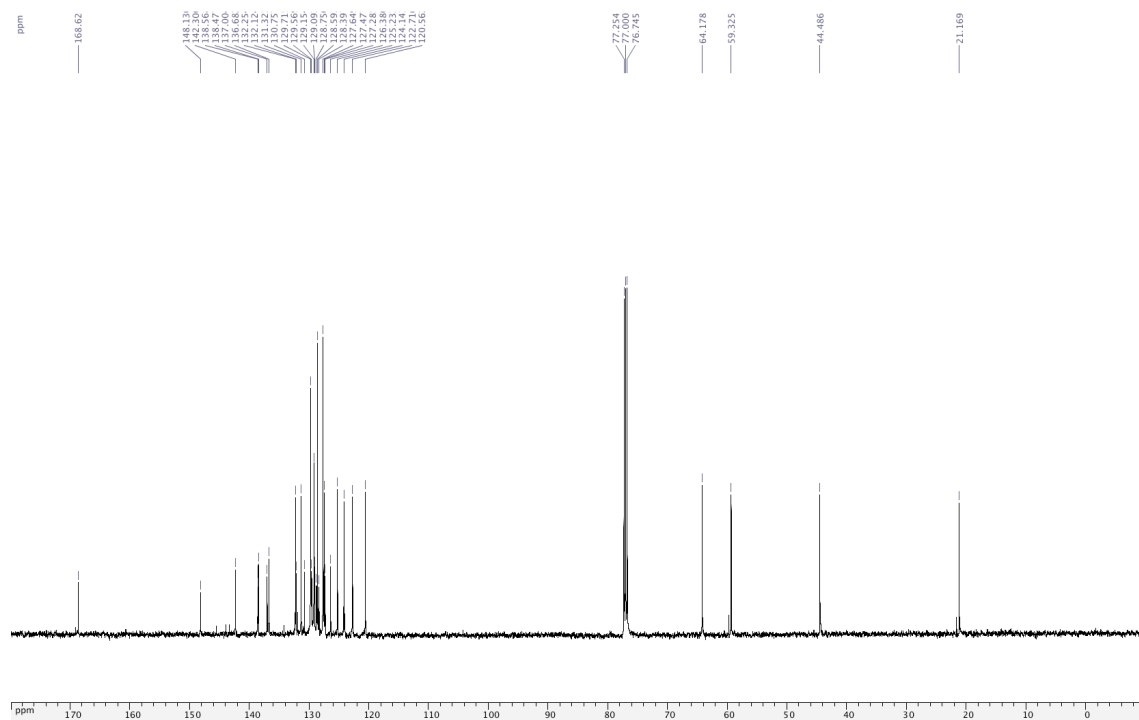

### 3ma

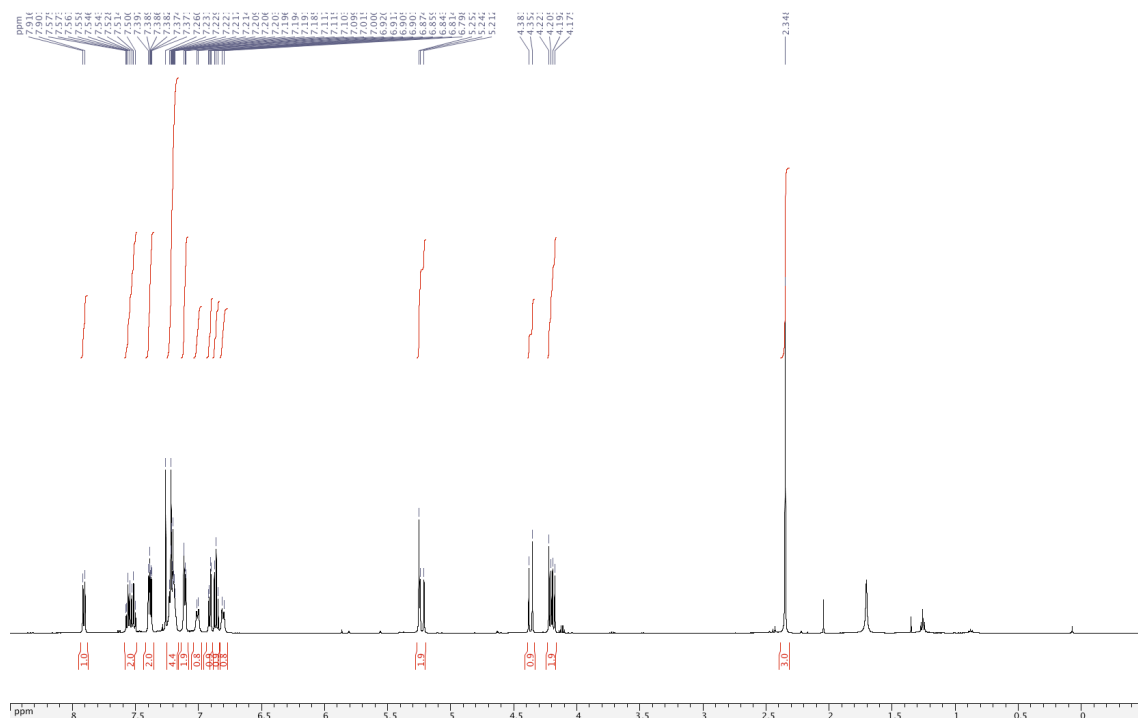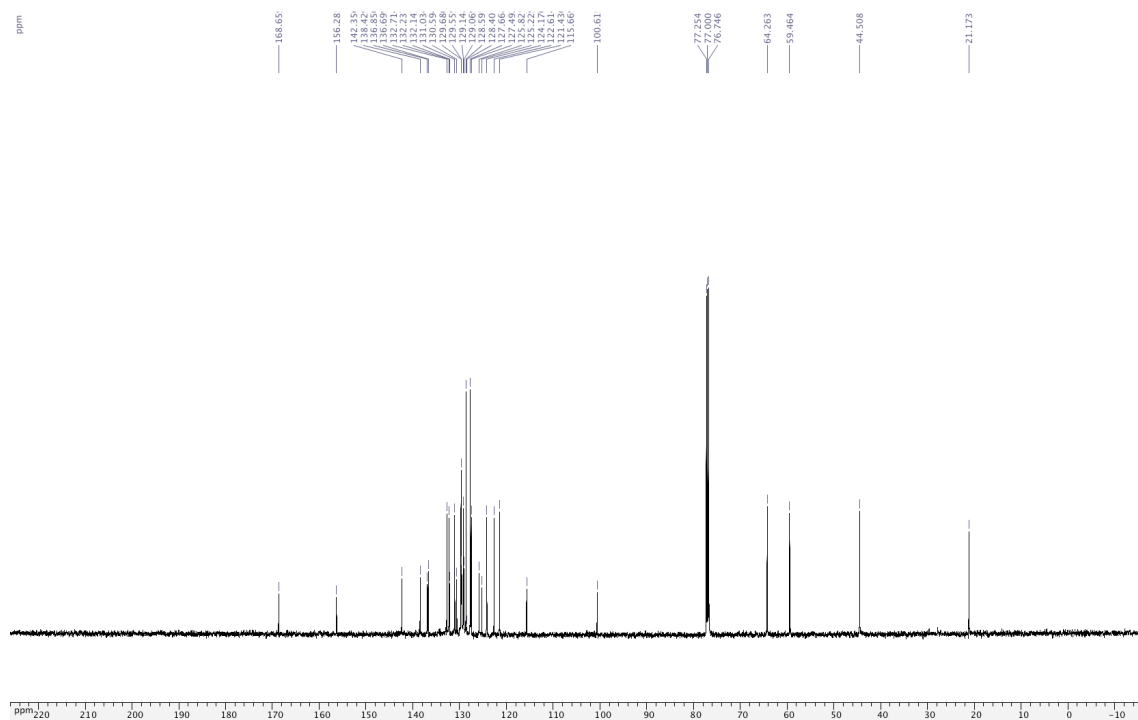

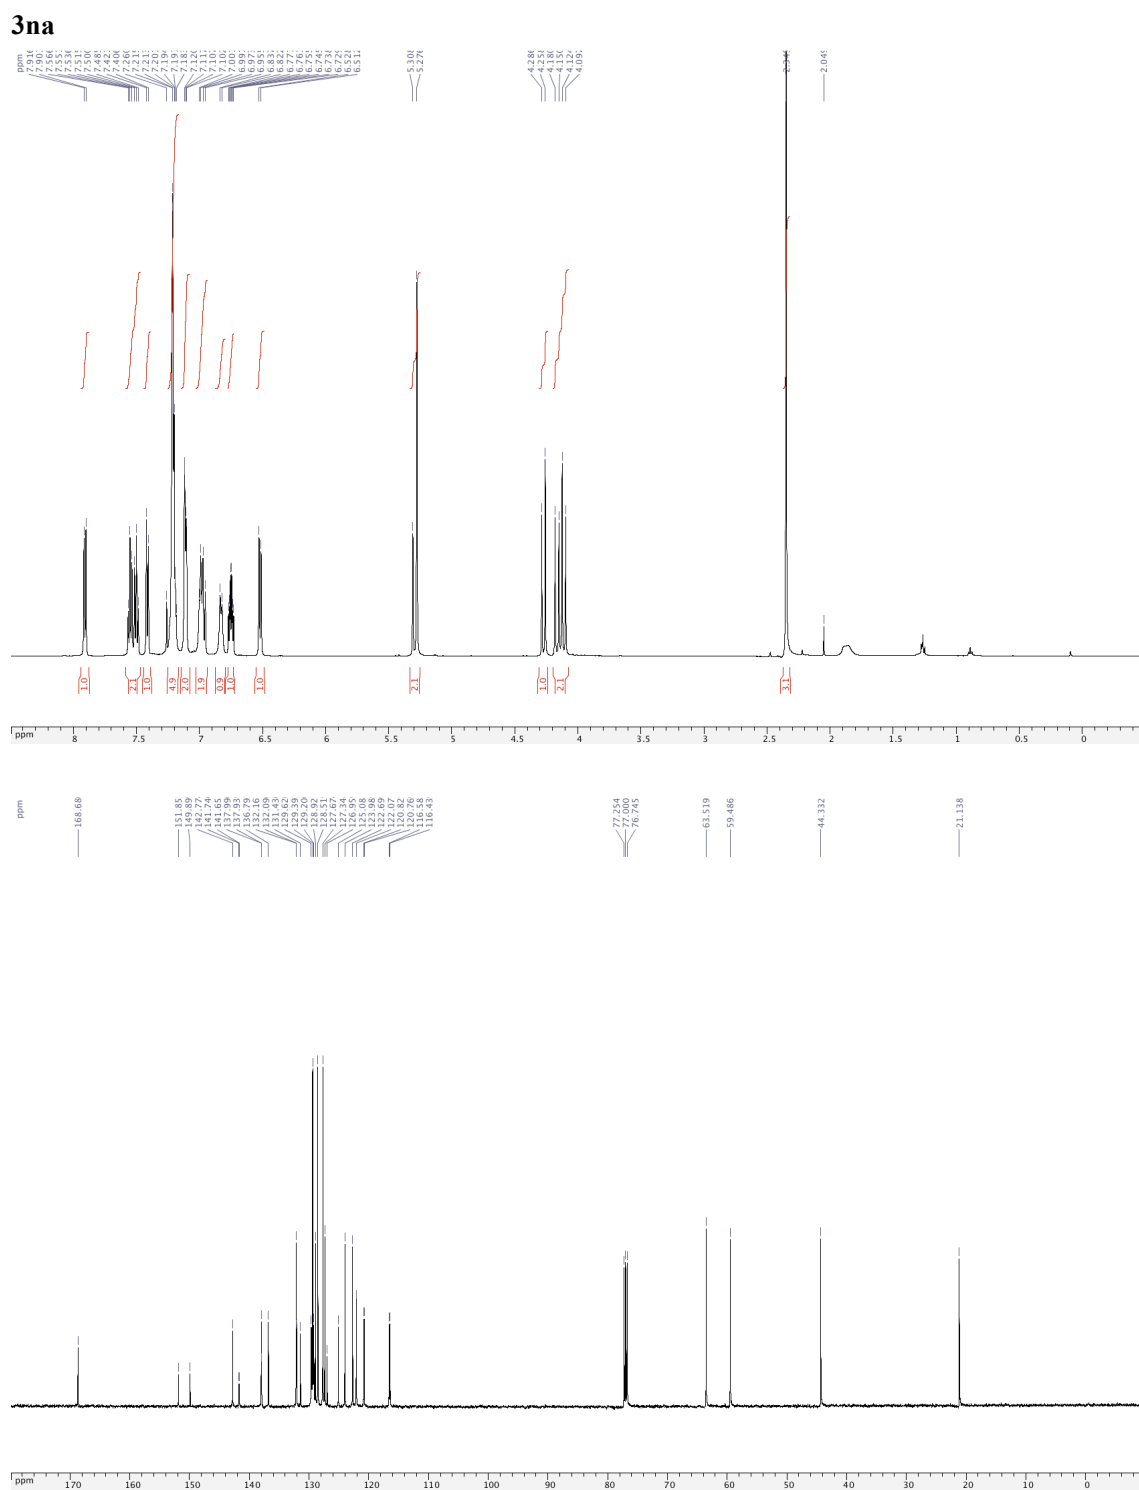

**30a**

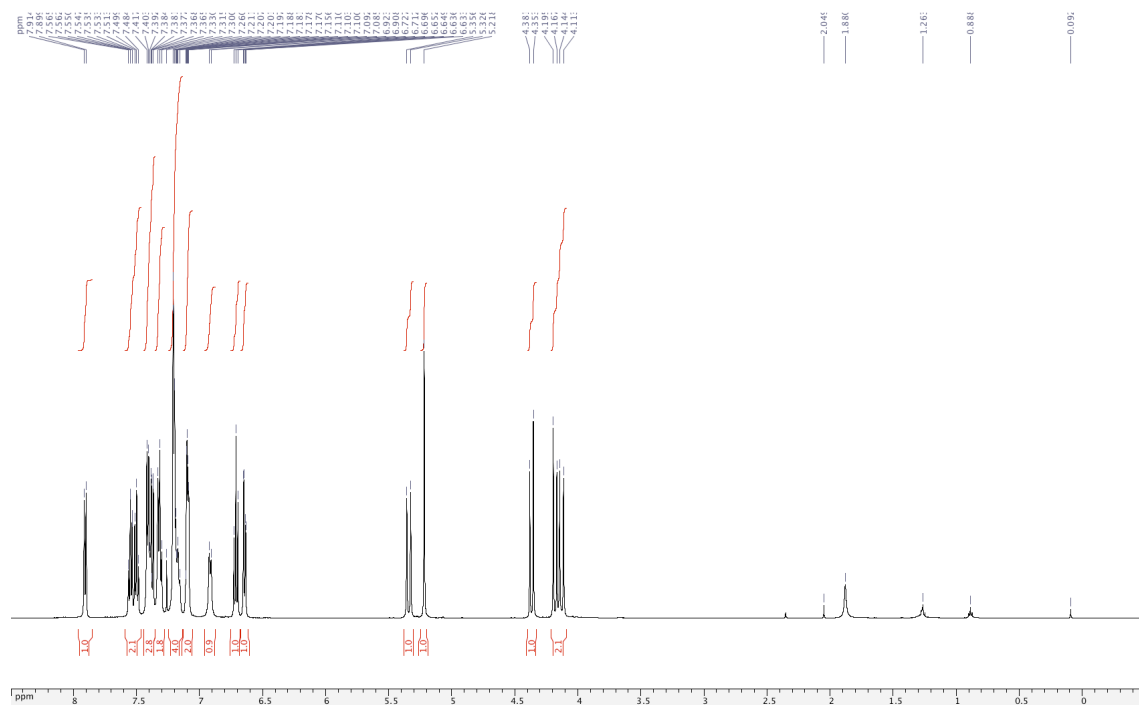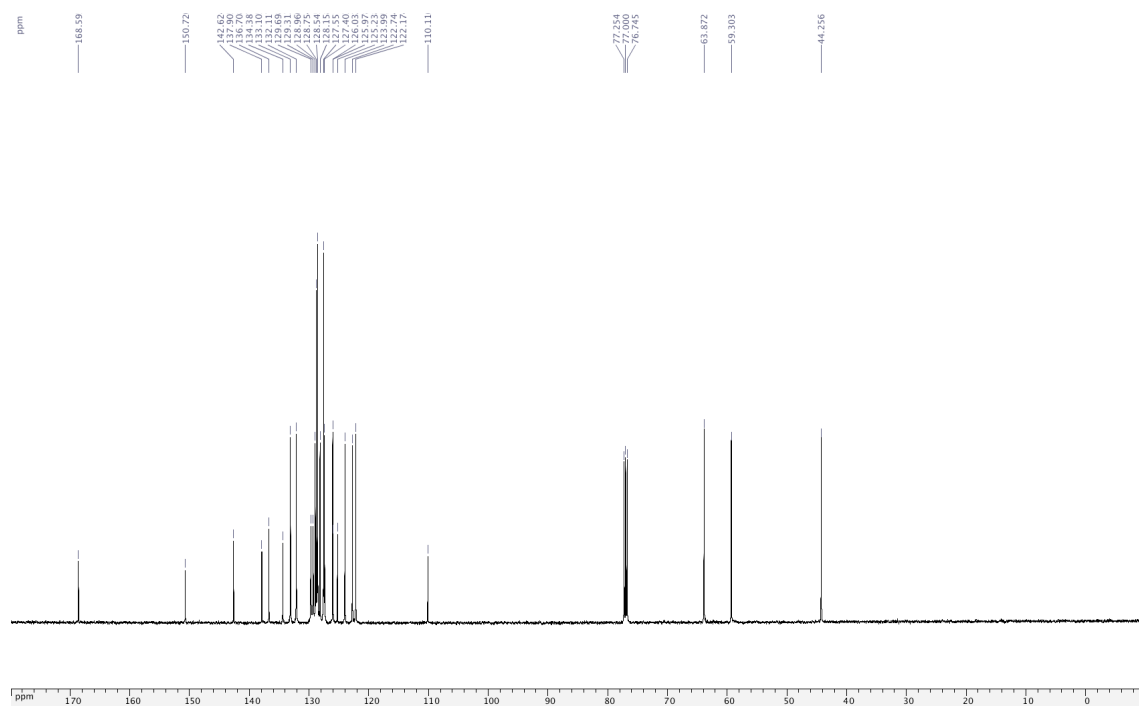

3pa

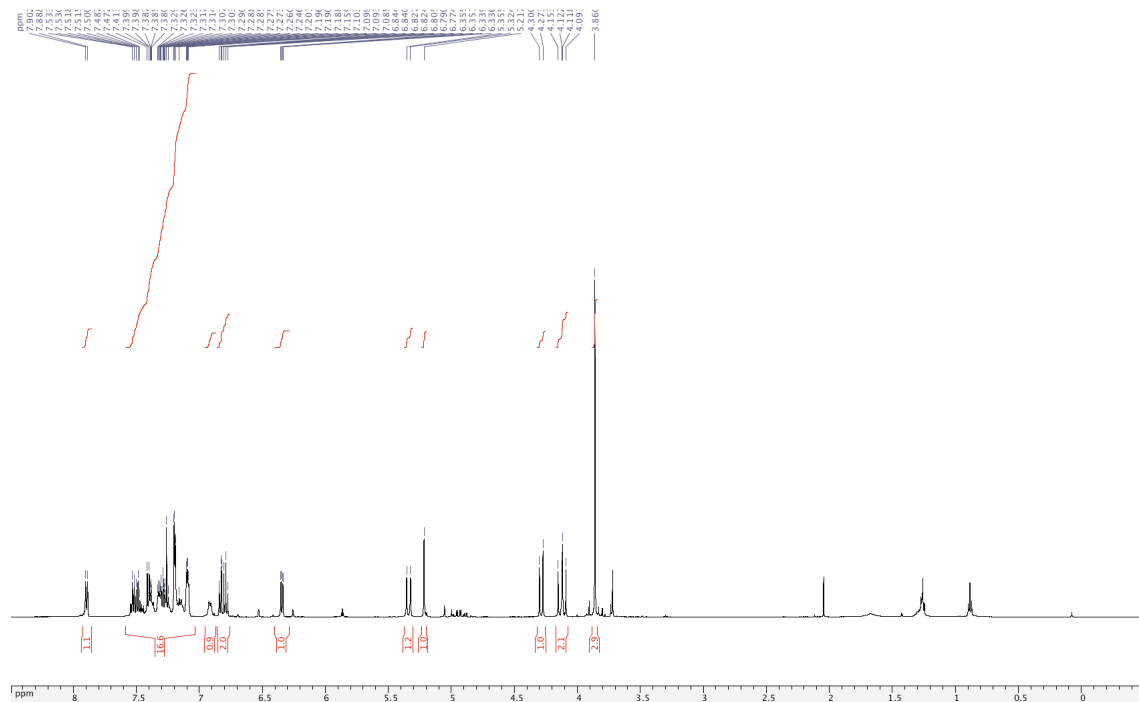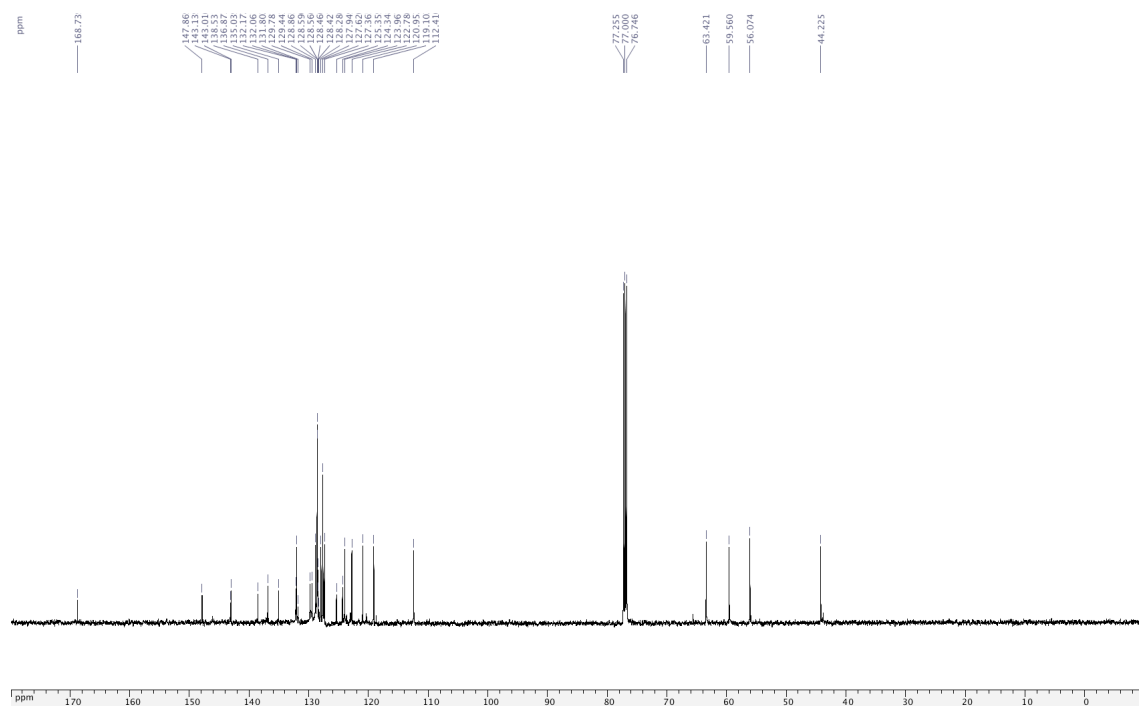





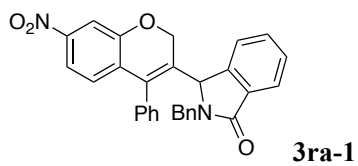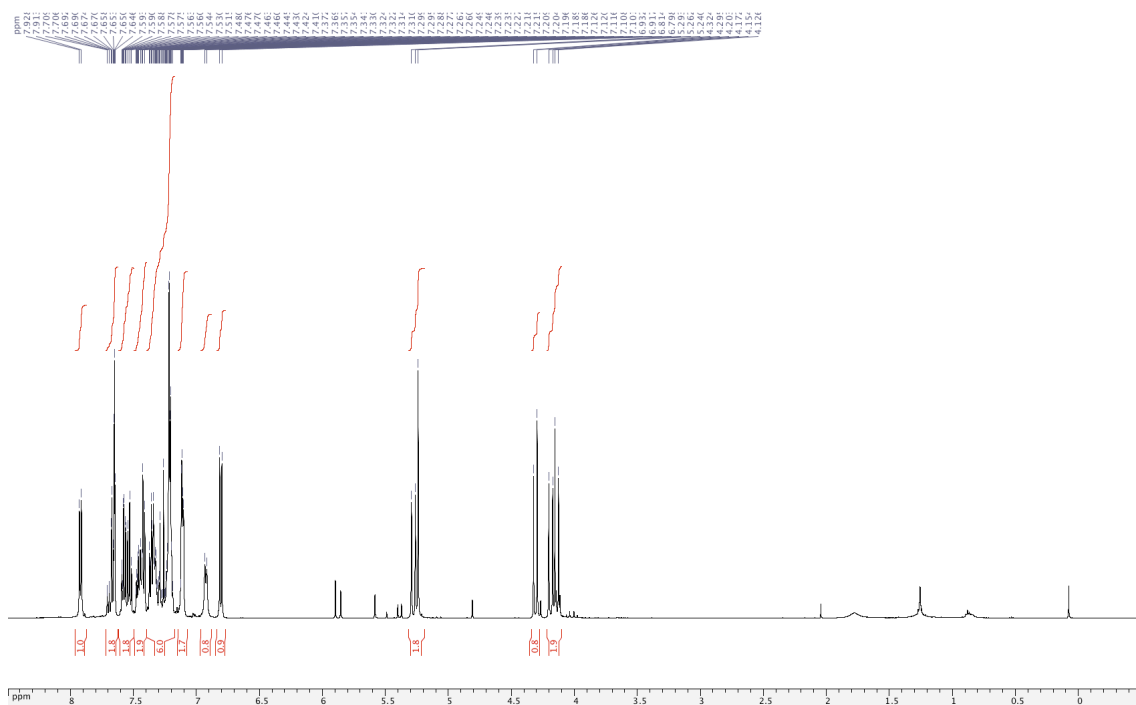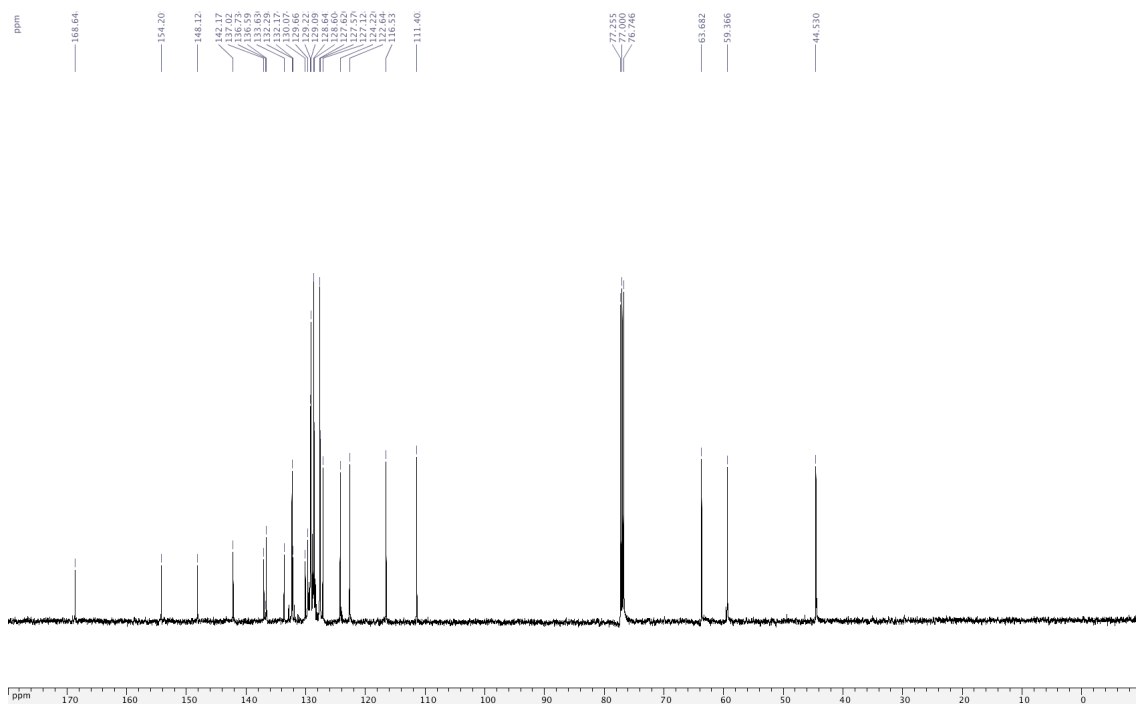







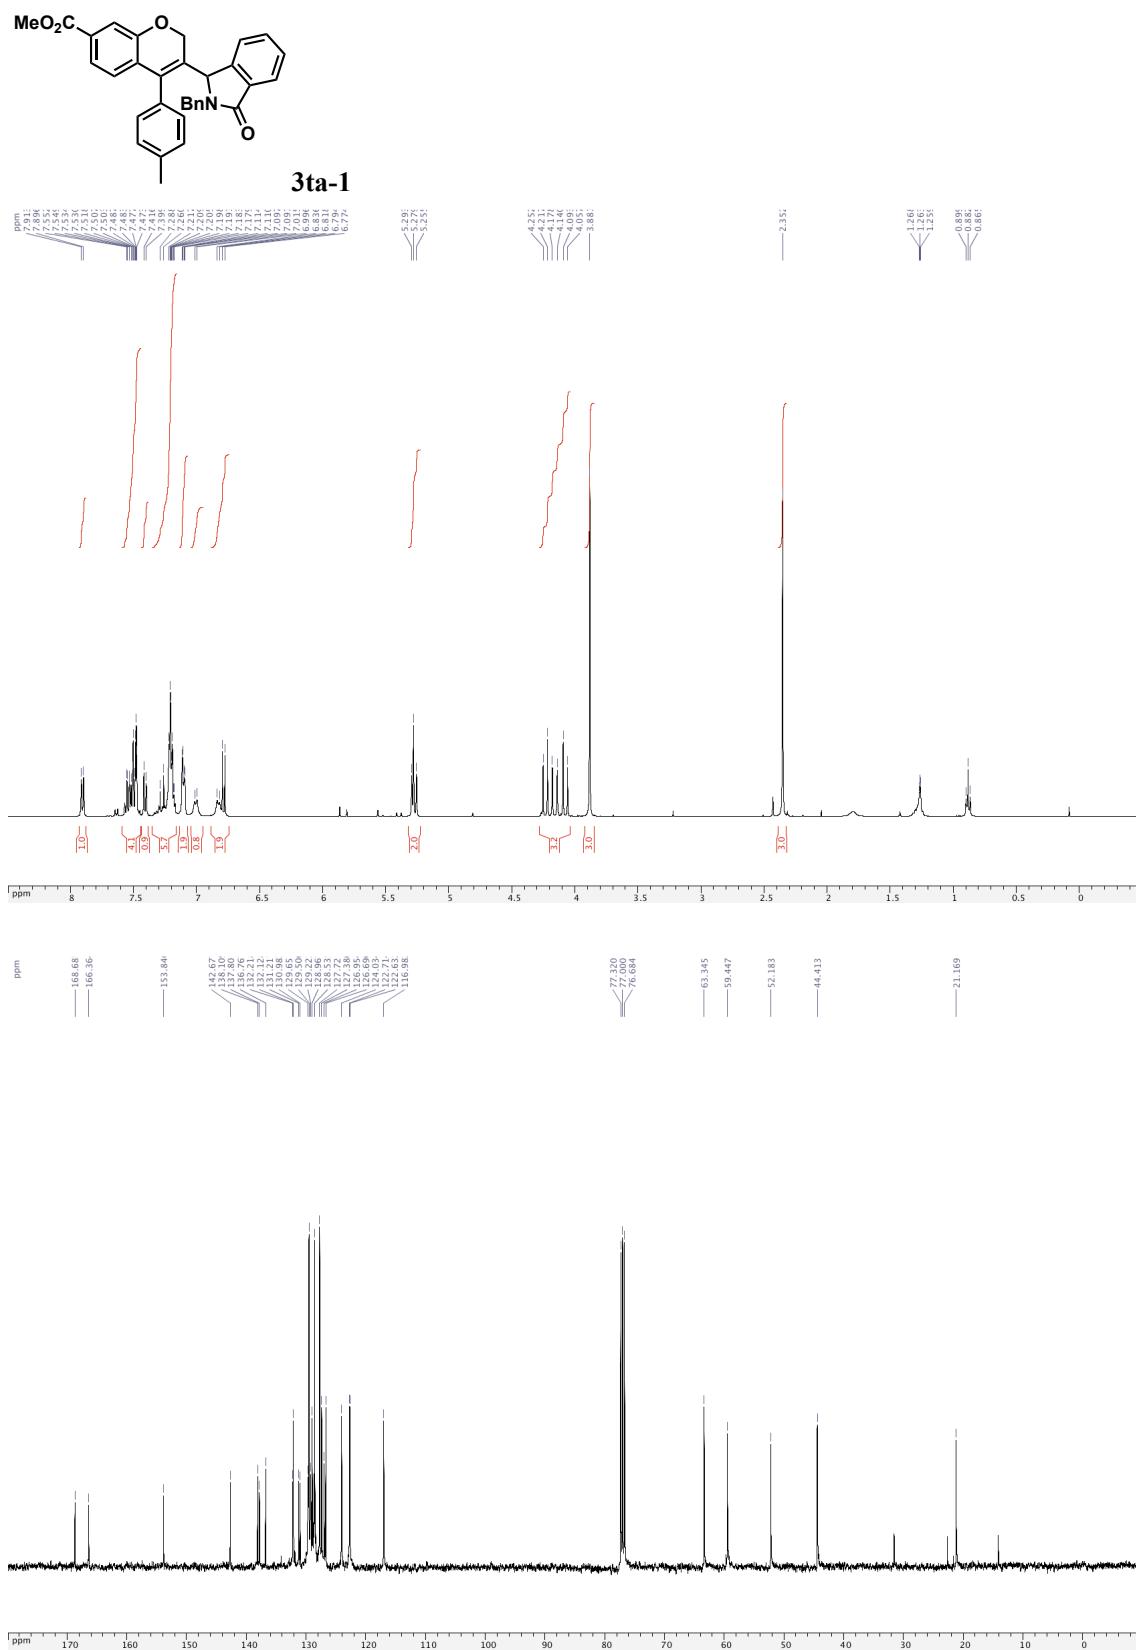

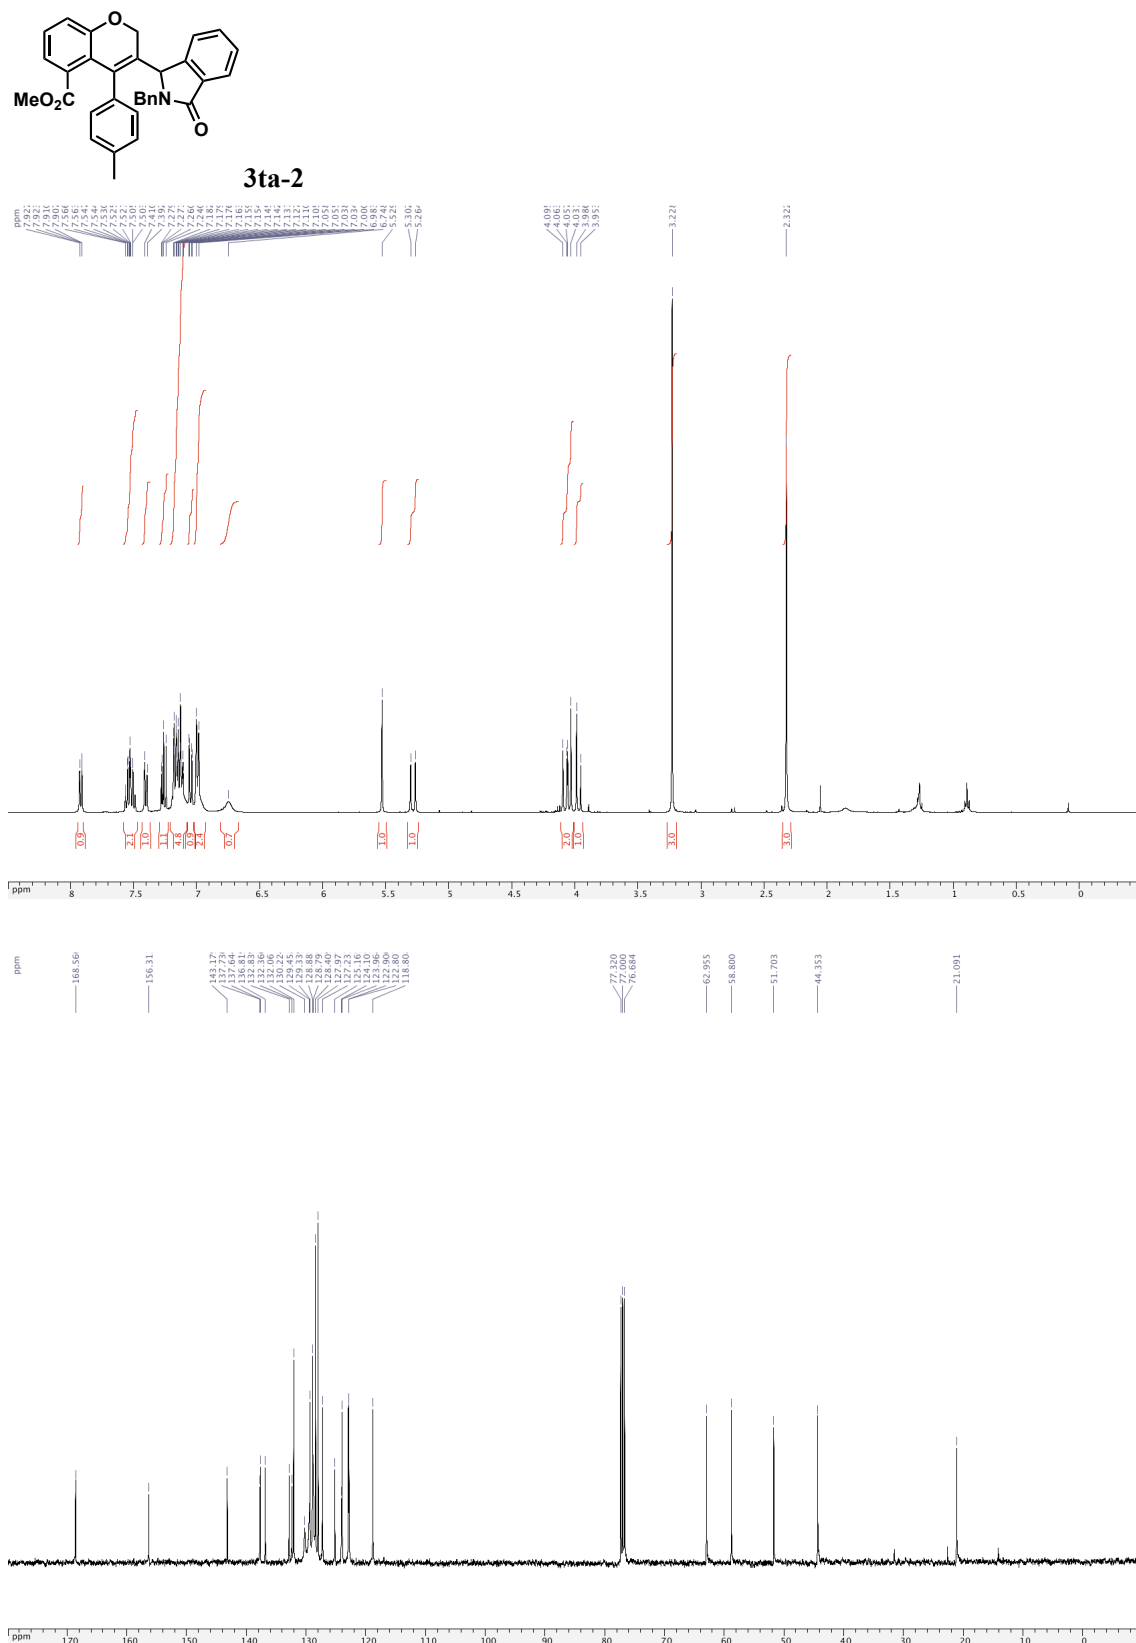

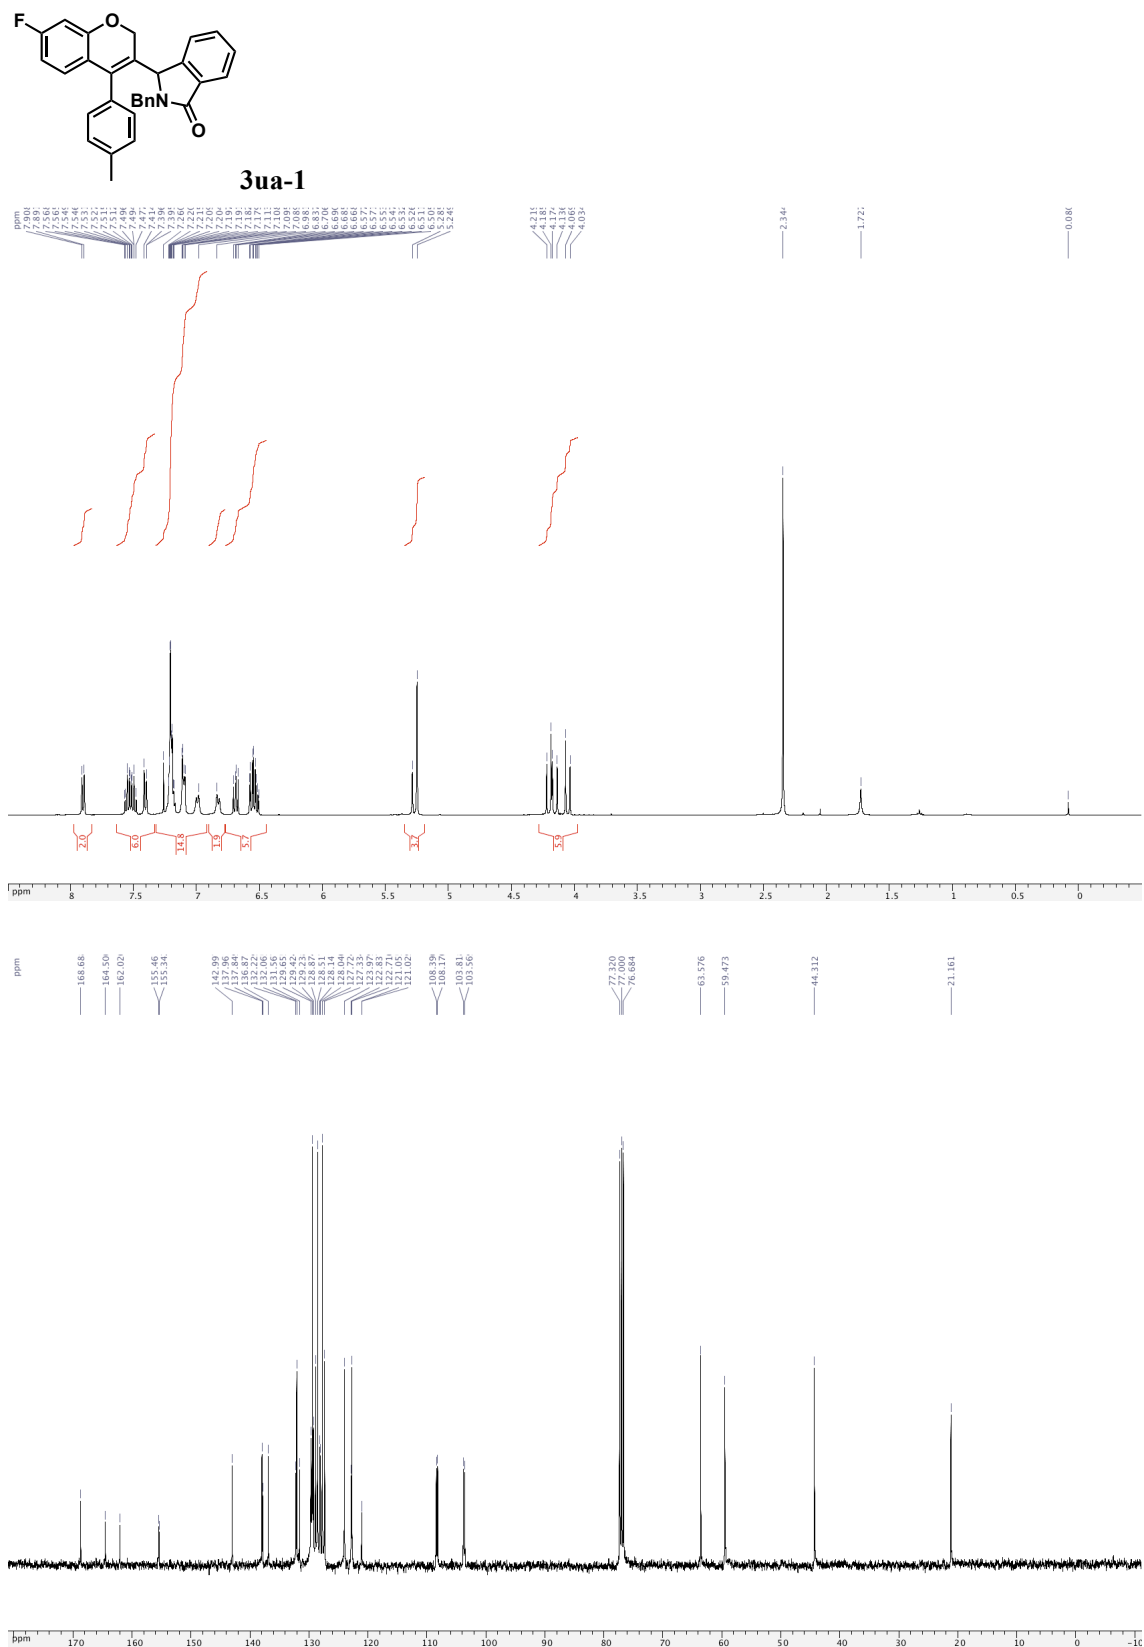



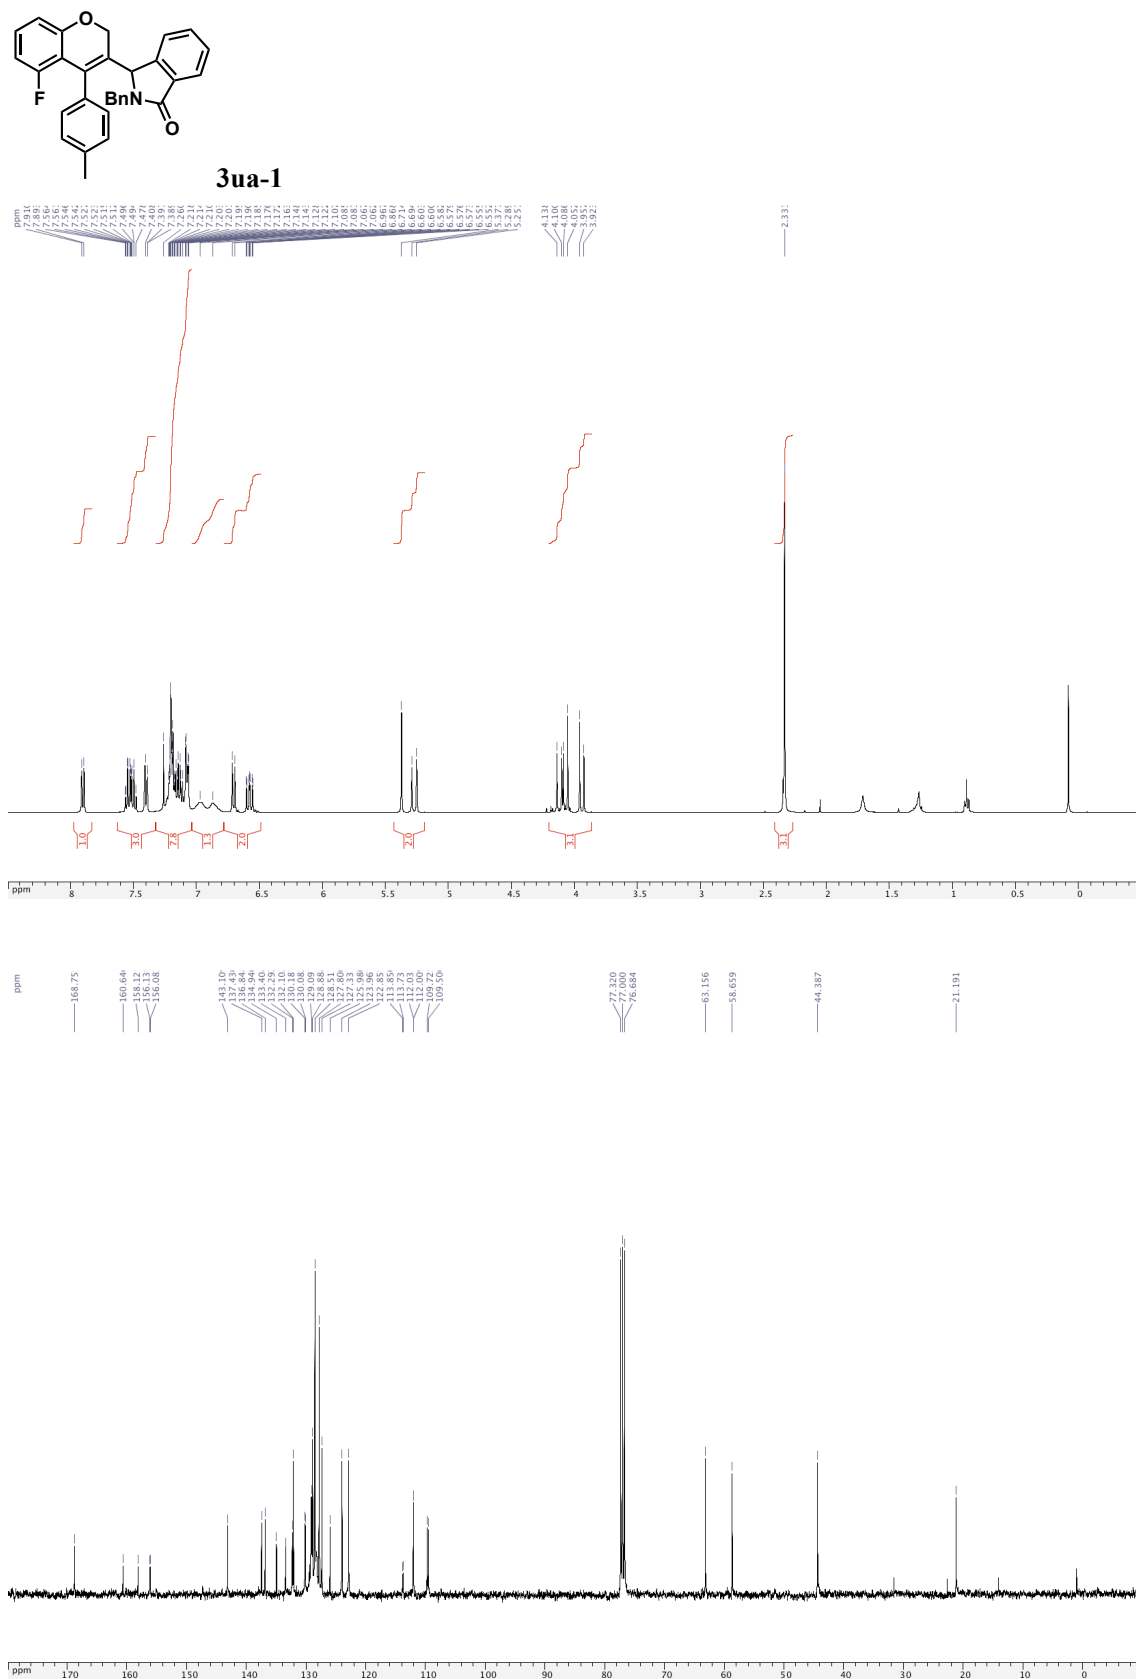

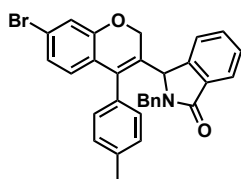

3va-1

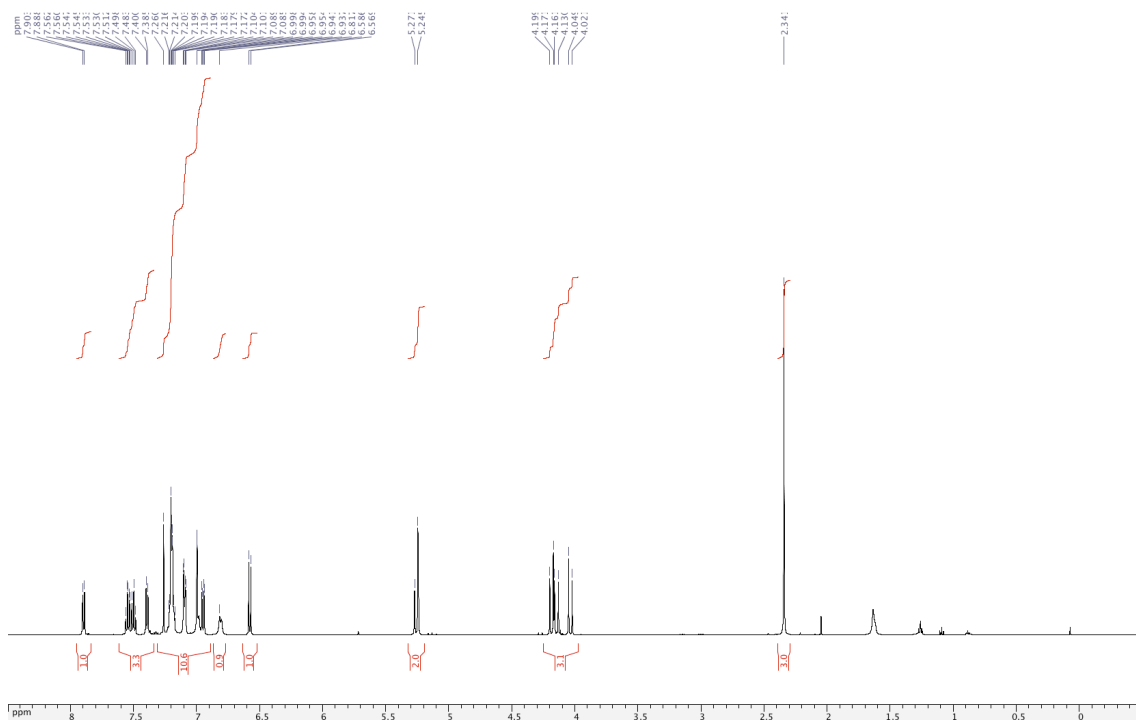



**3wb**

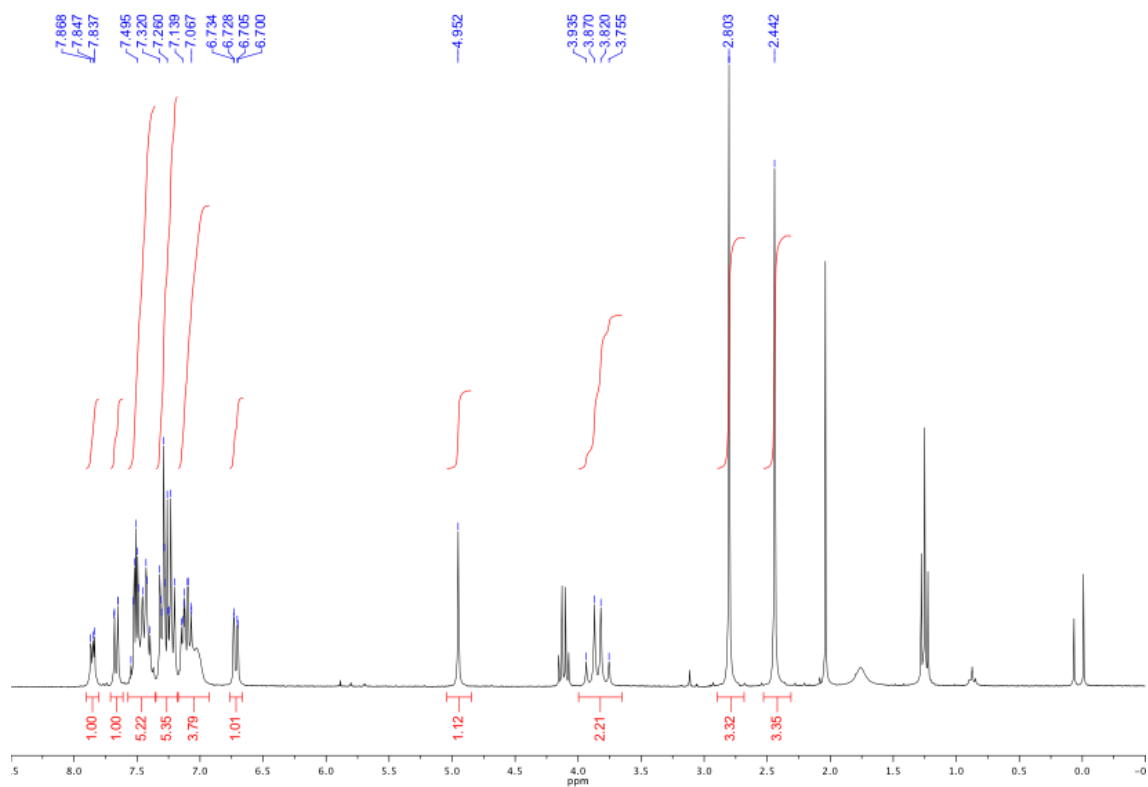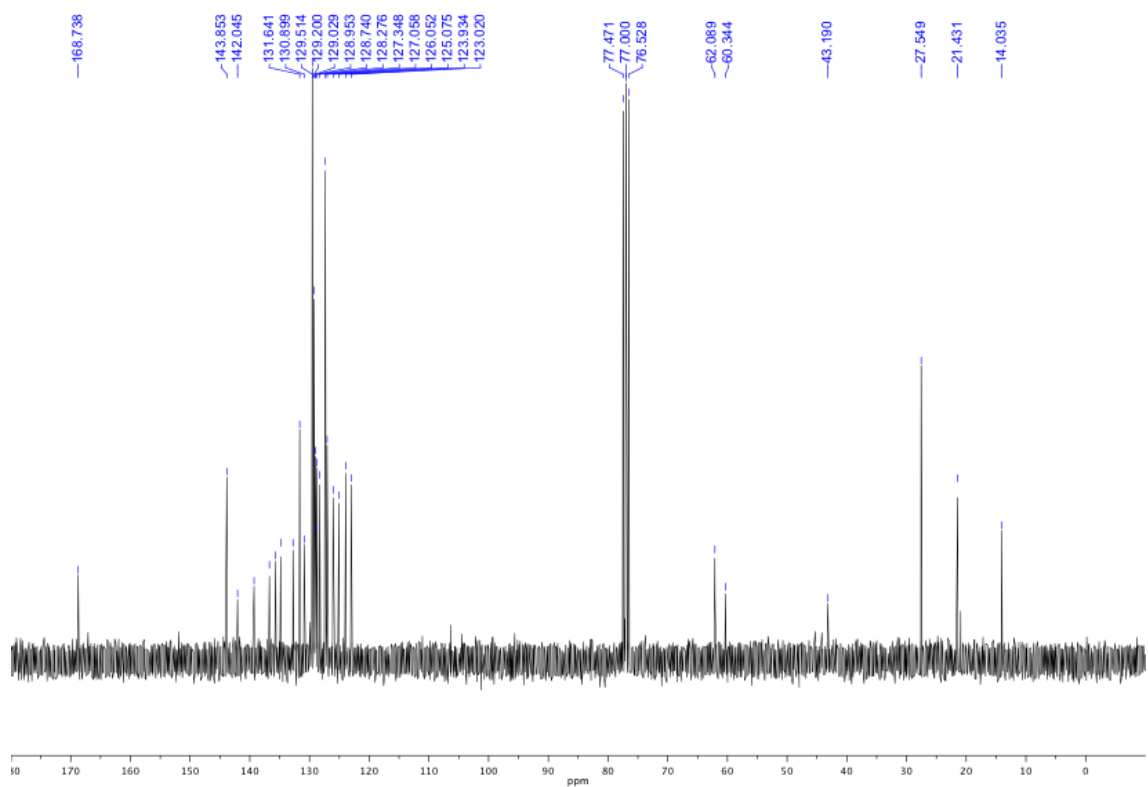

**3xb**

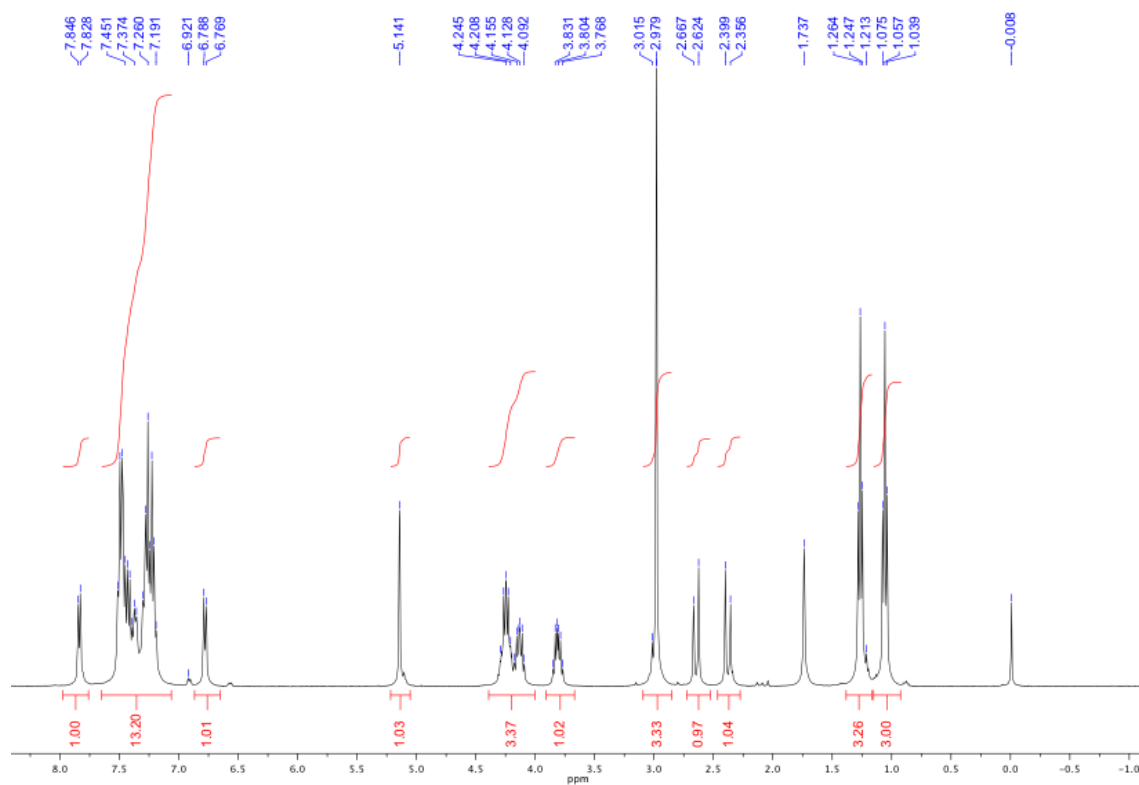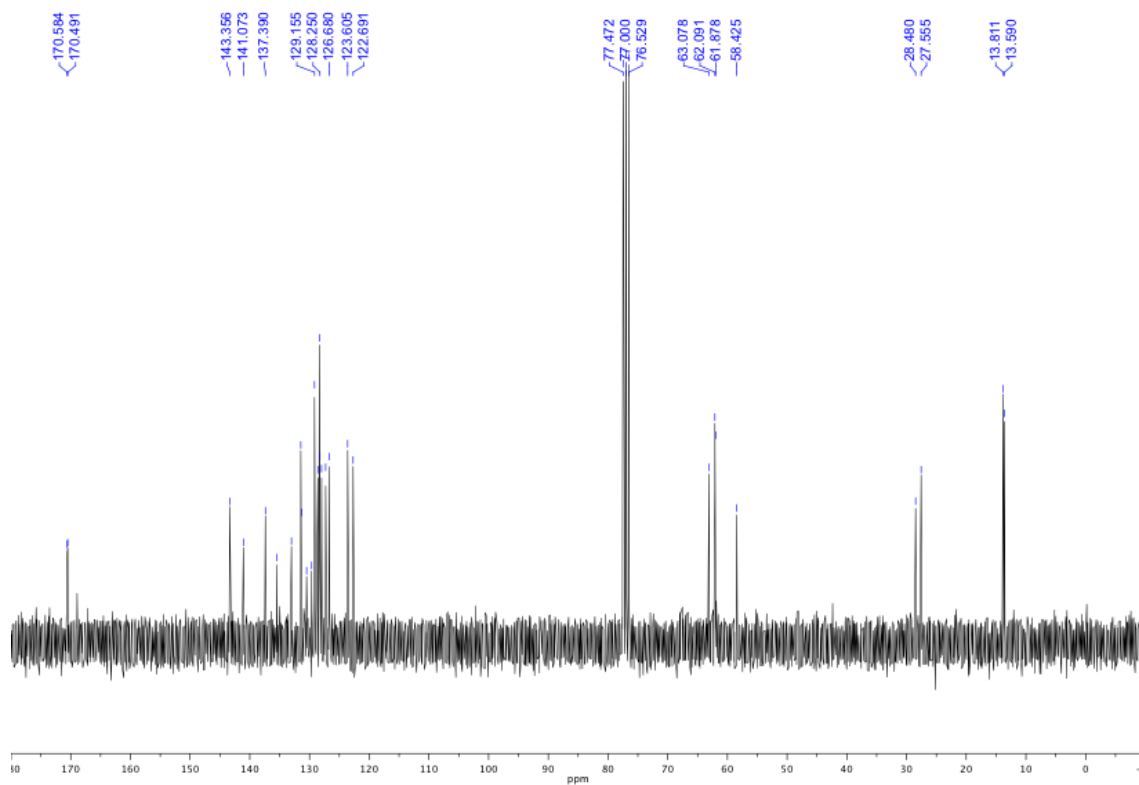

**3yb** (mixture of *cis* and *trans*)

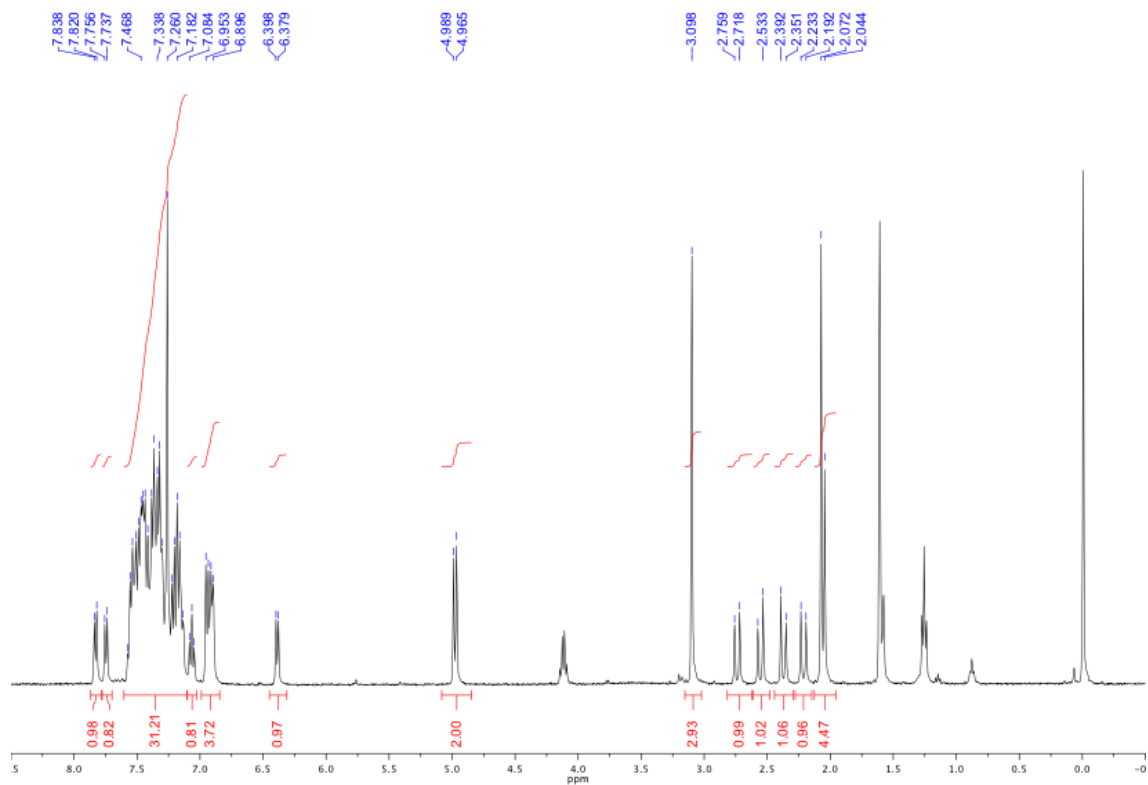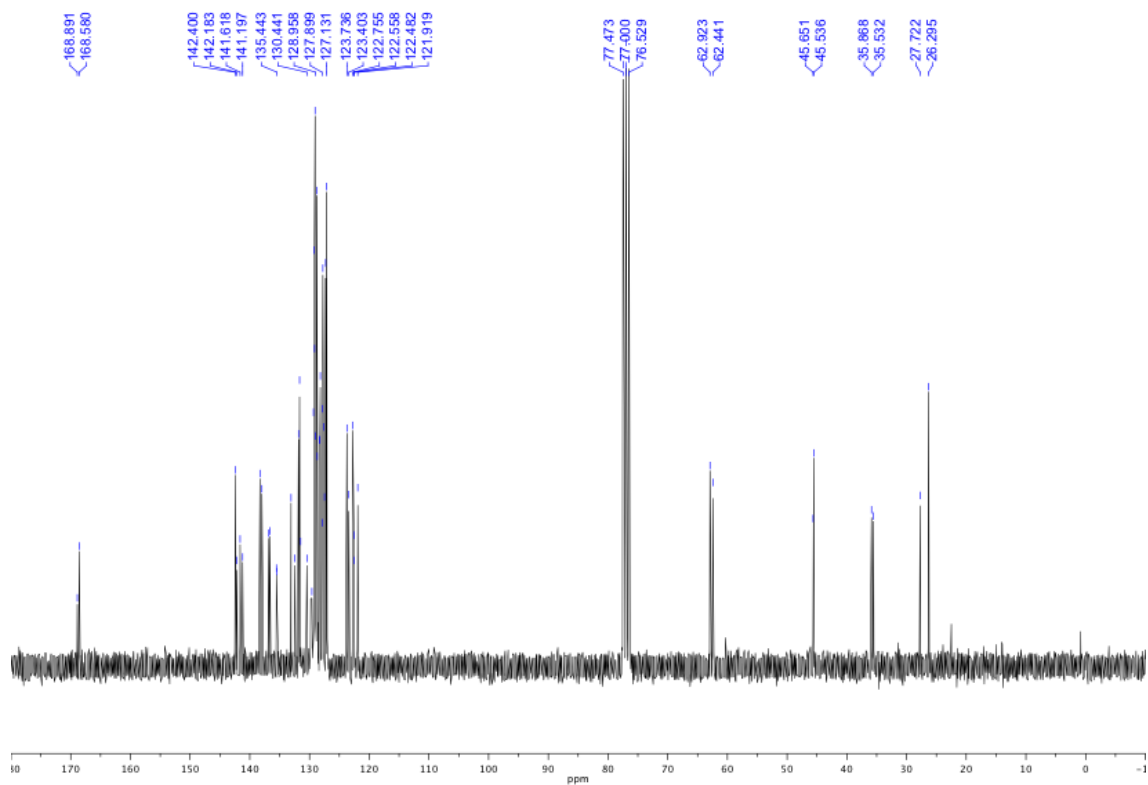

**3ac**

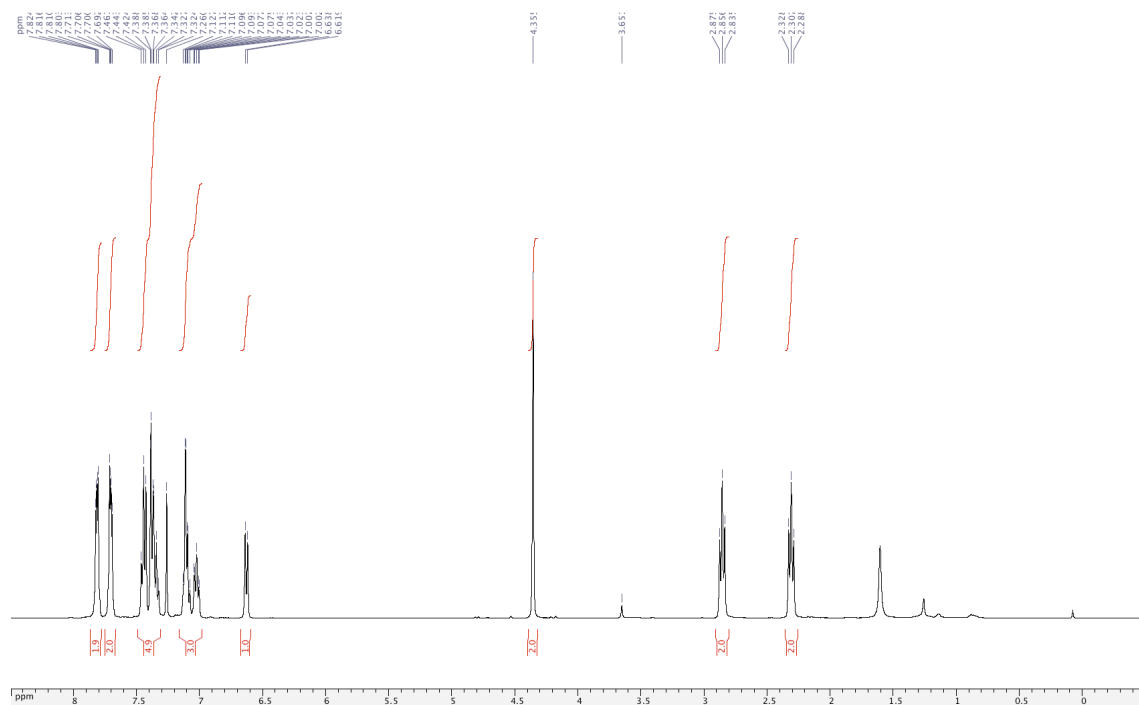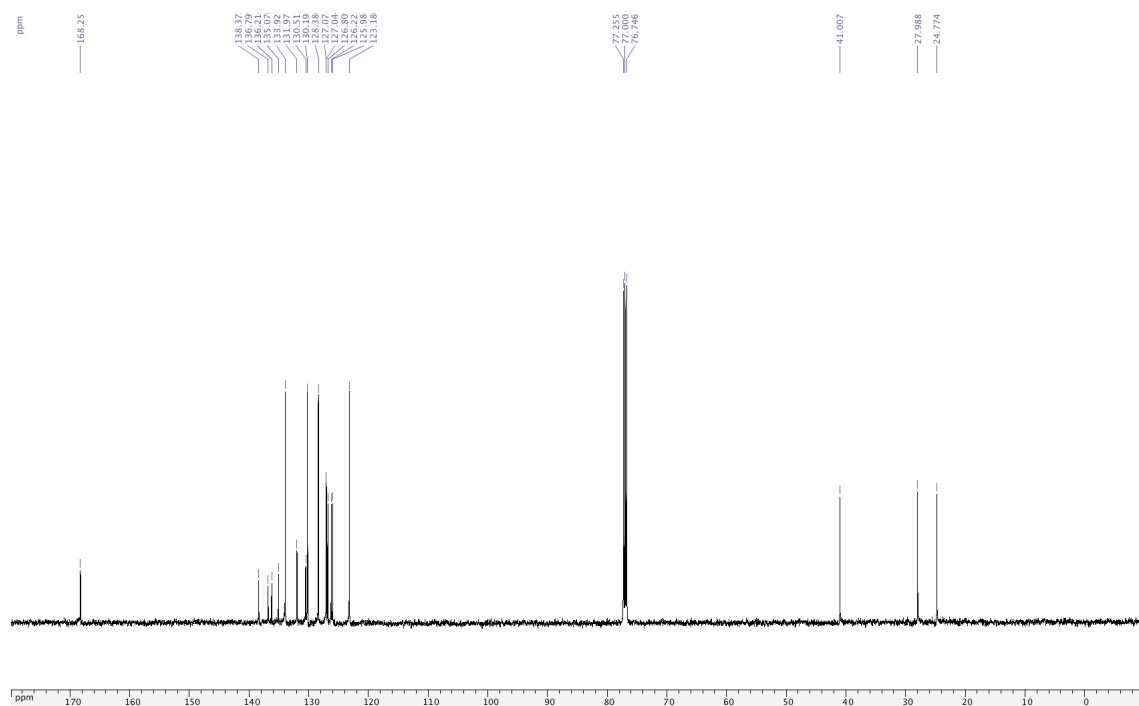





5

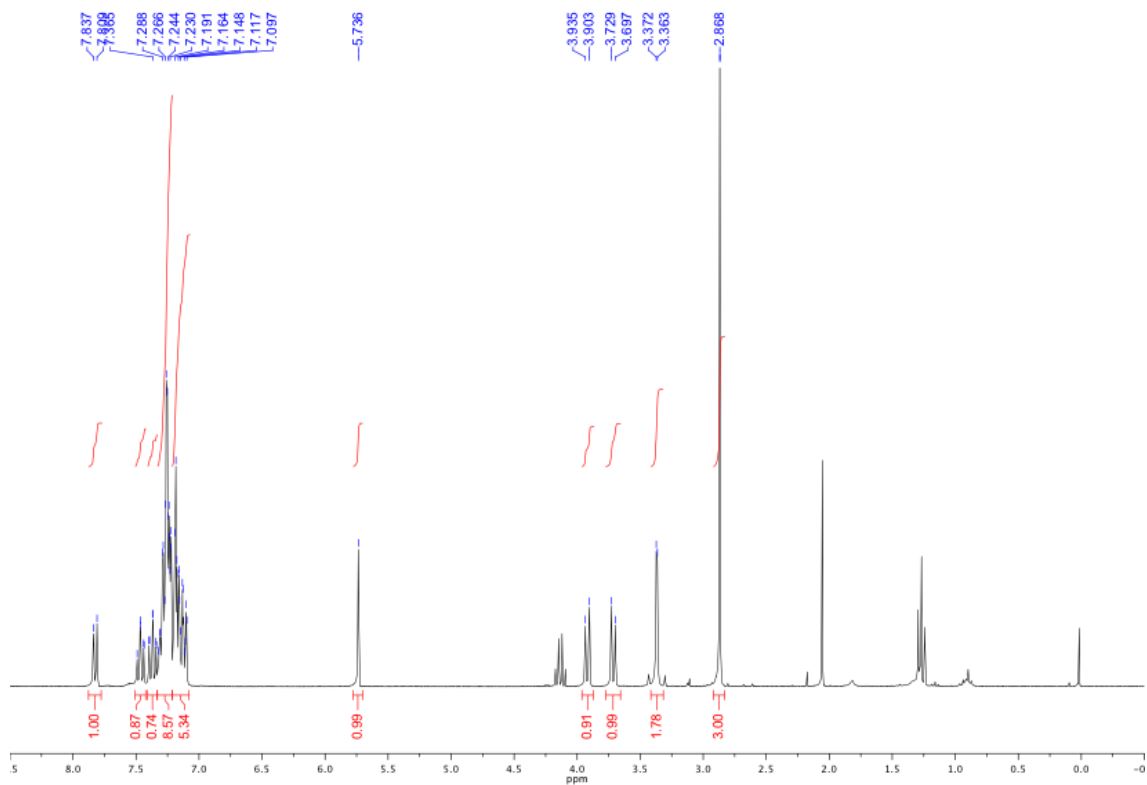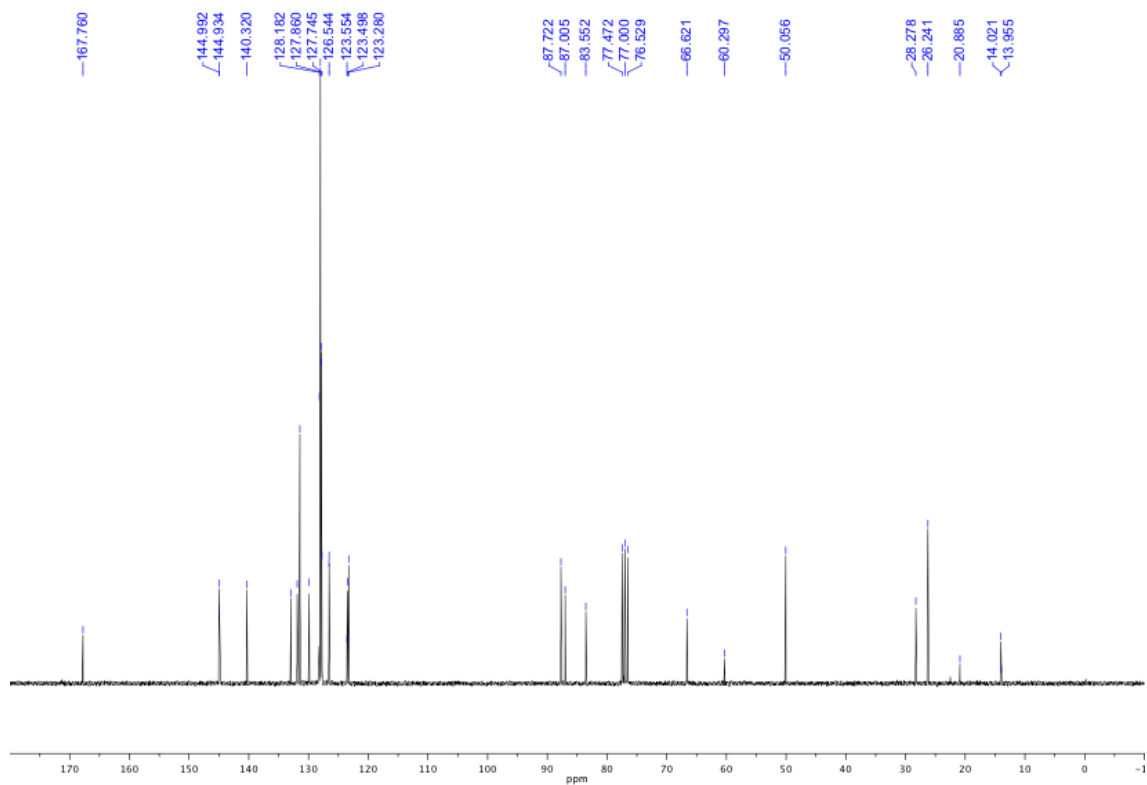

6

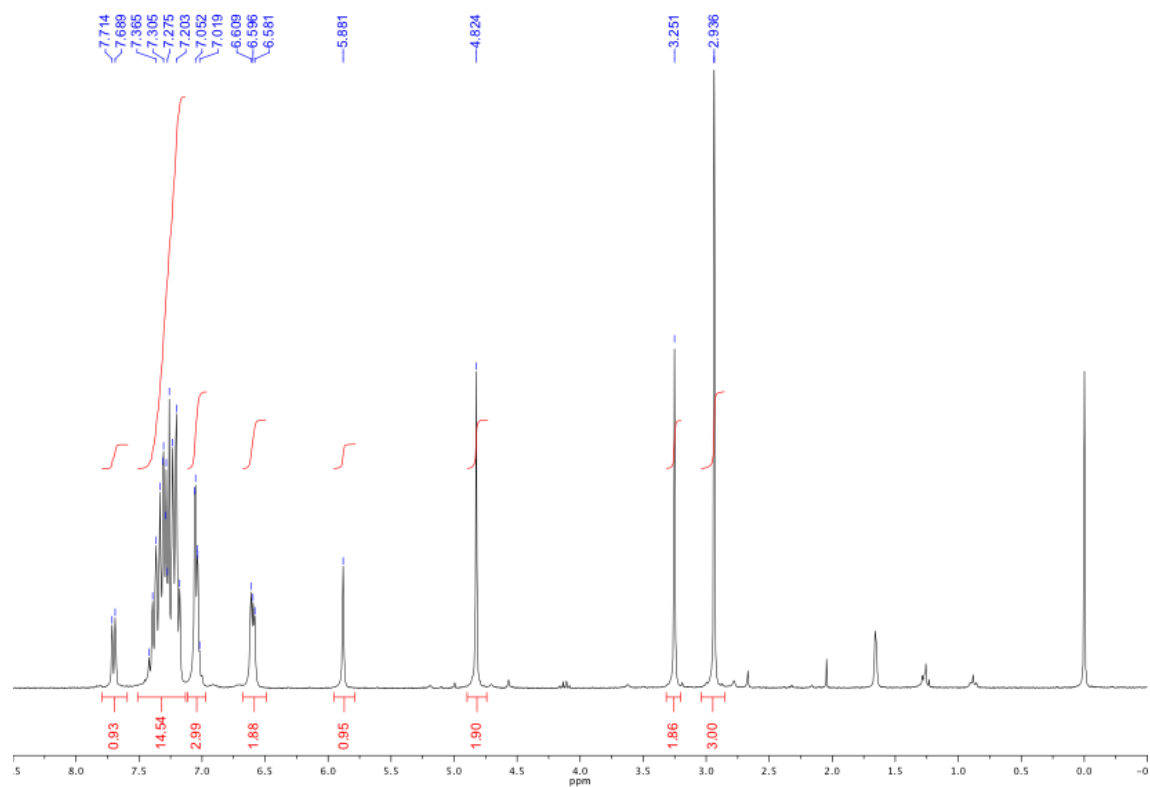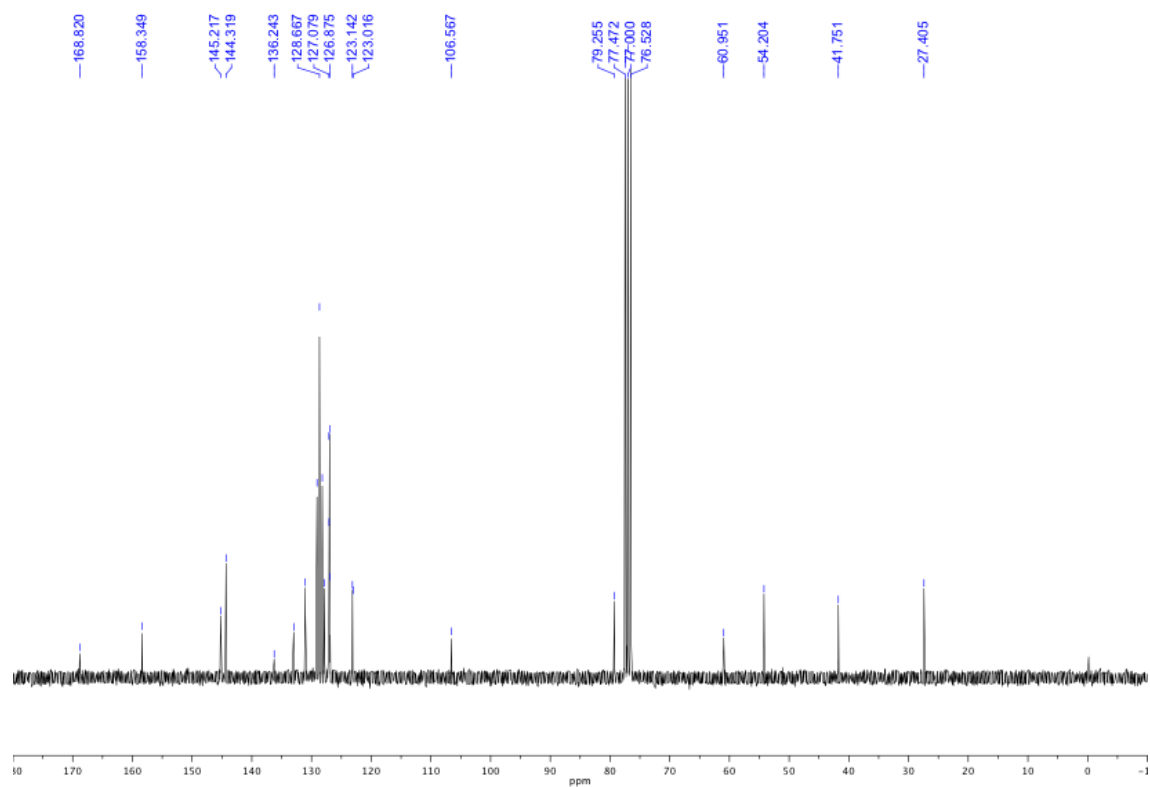

*trans*-7ab

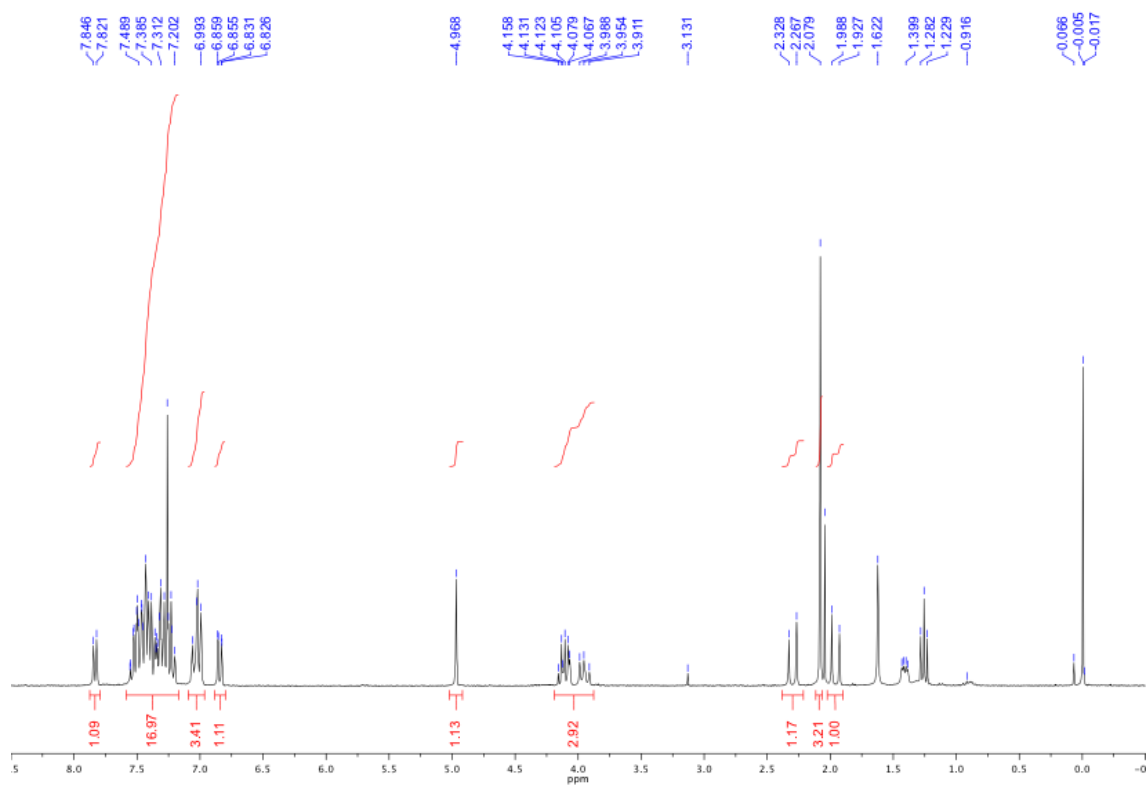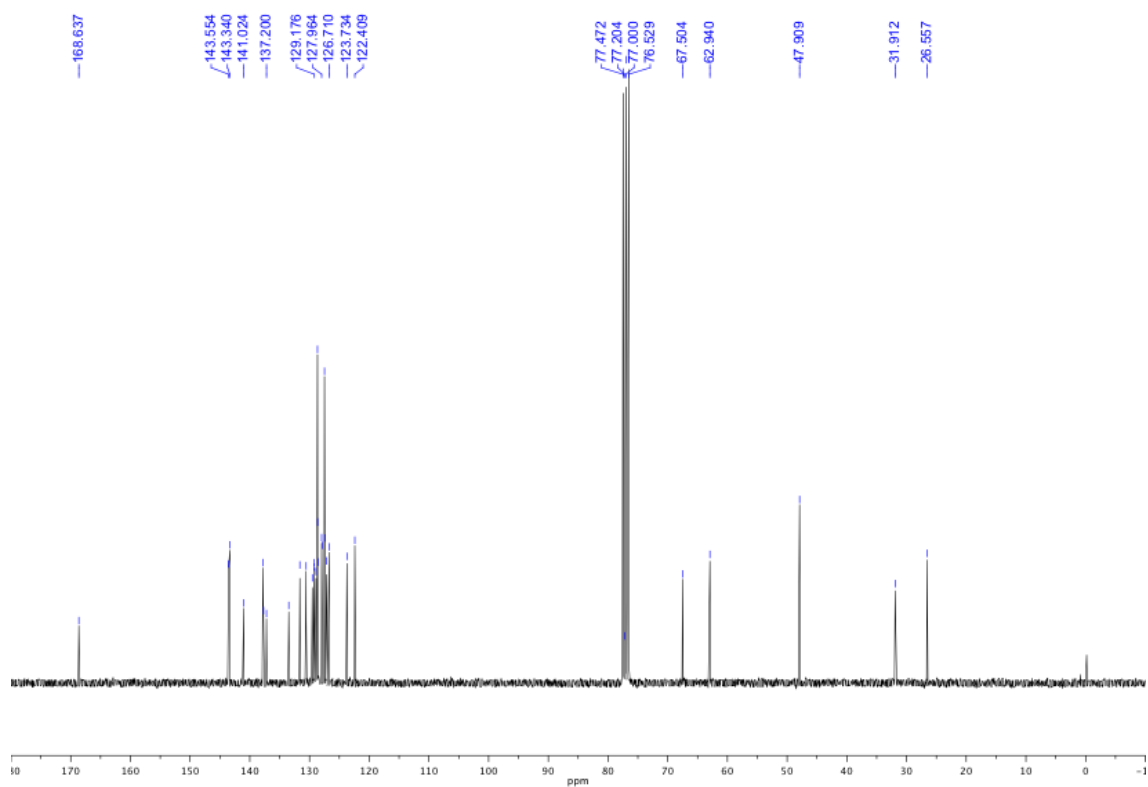

*cis-7ab*

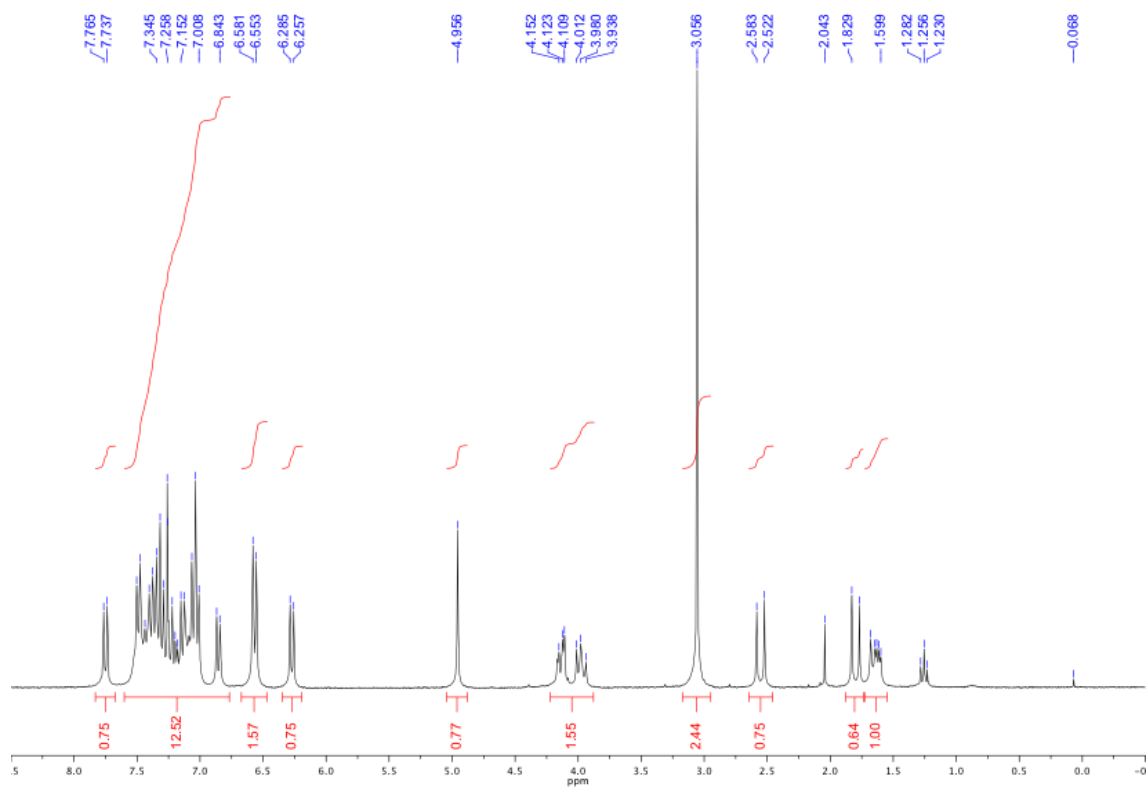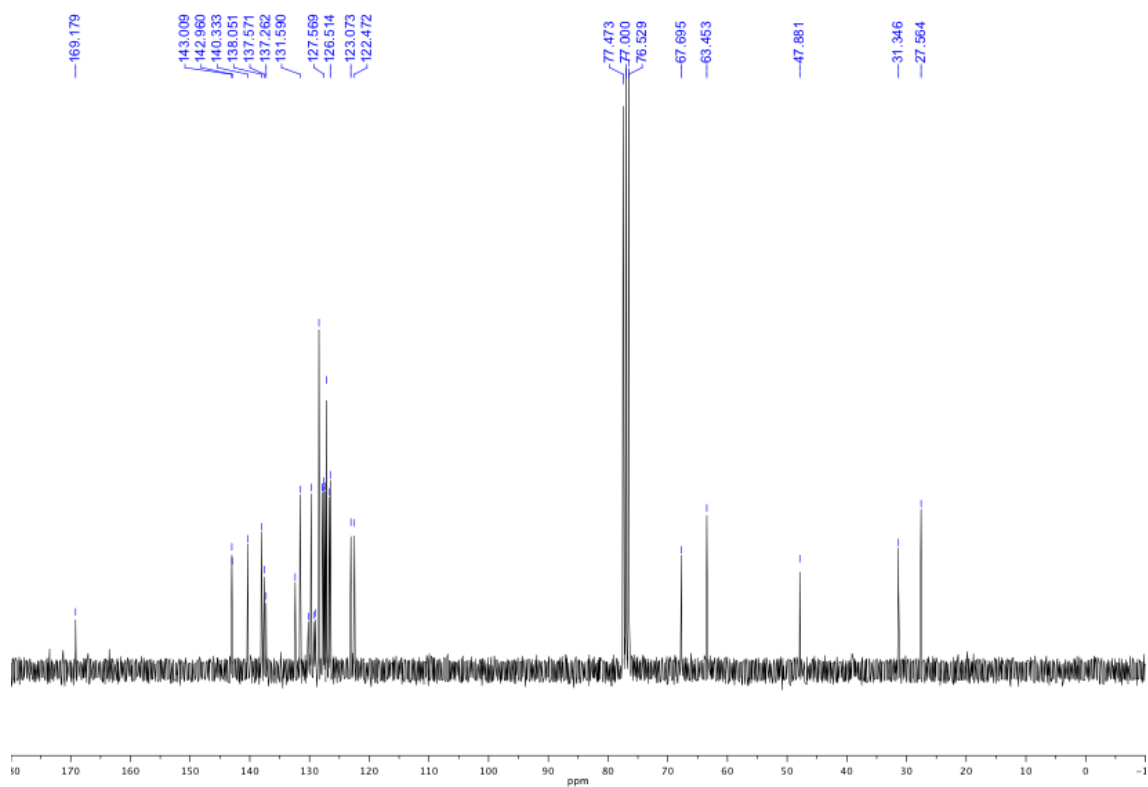

7bb

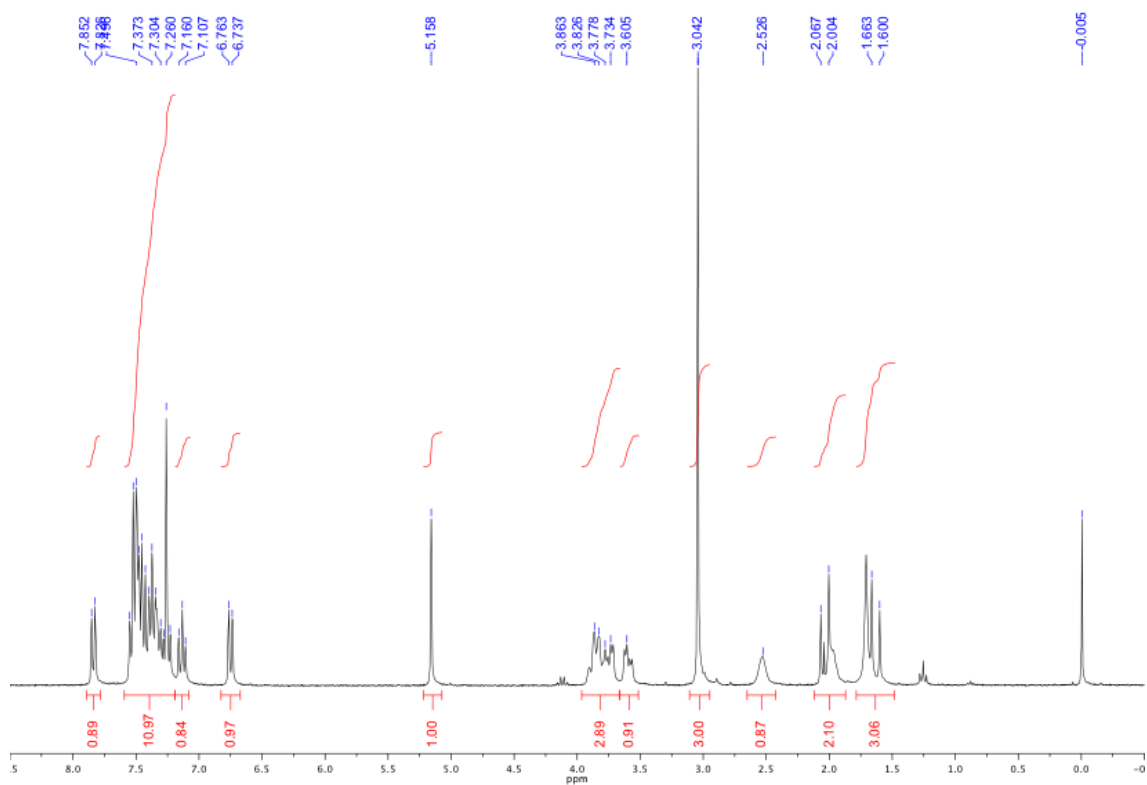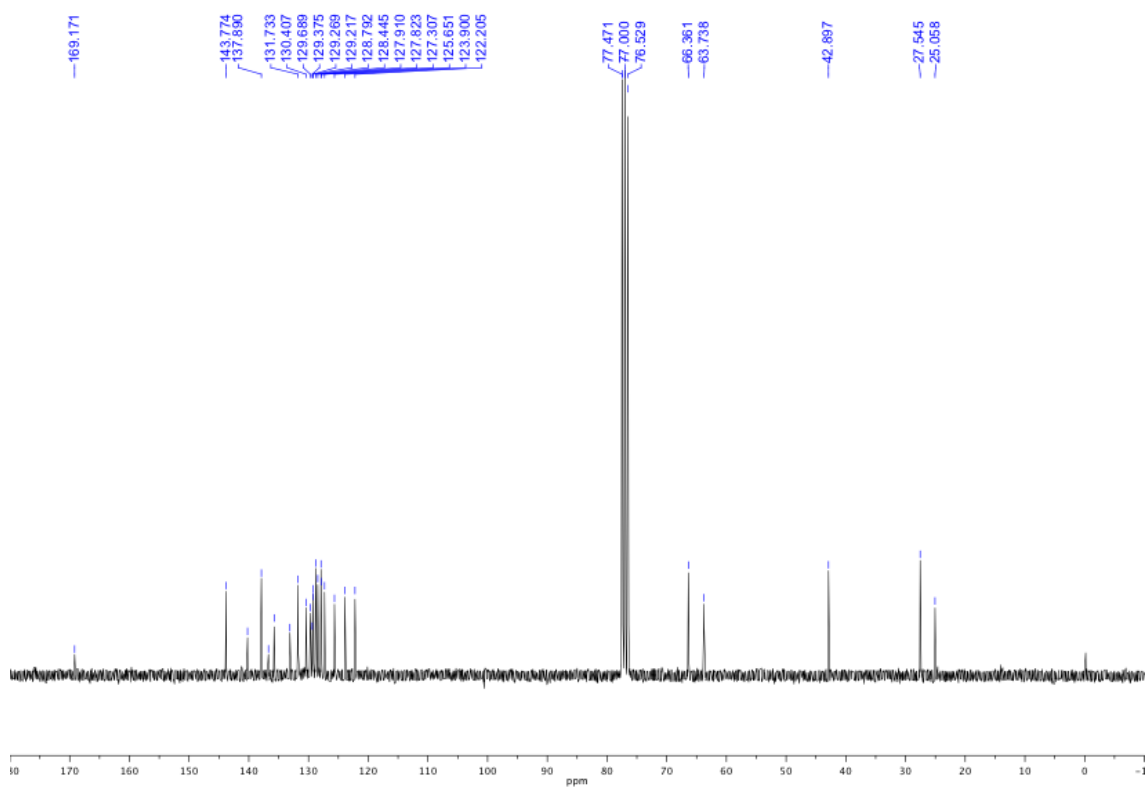

7cb

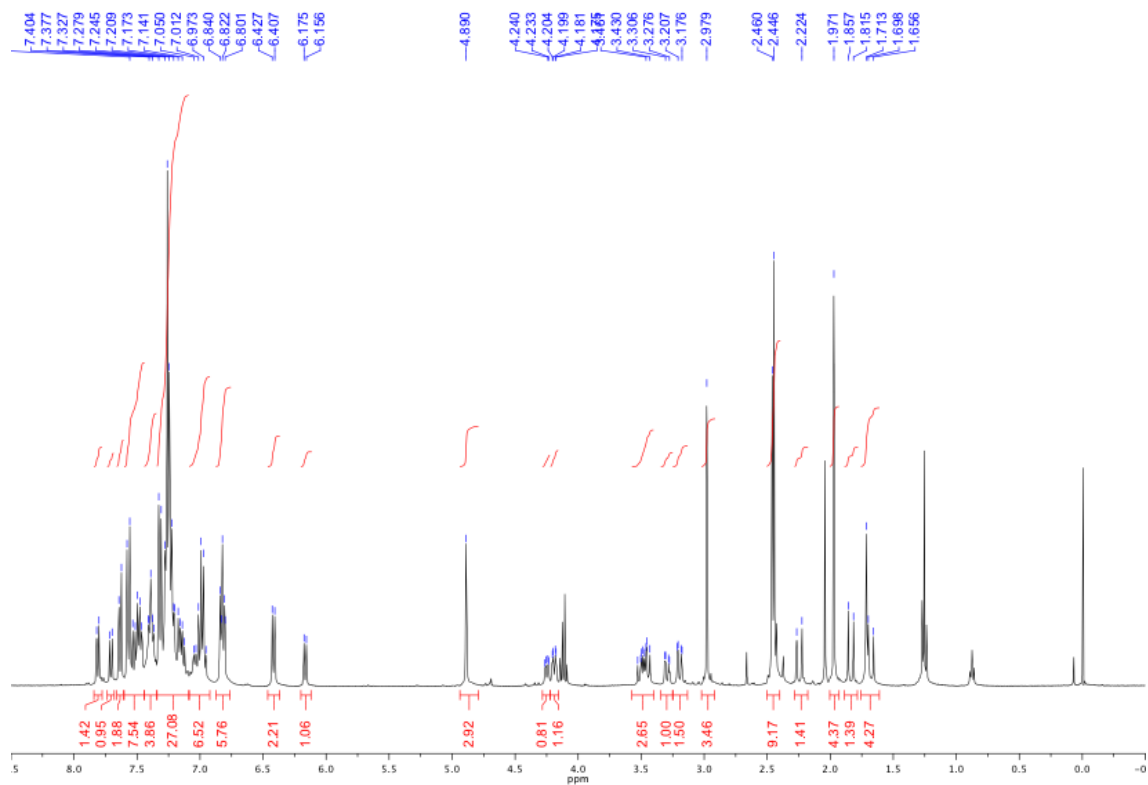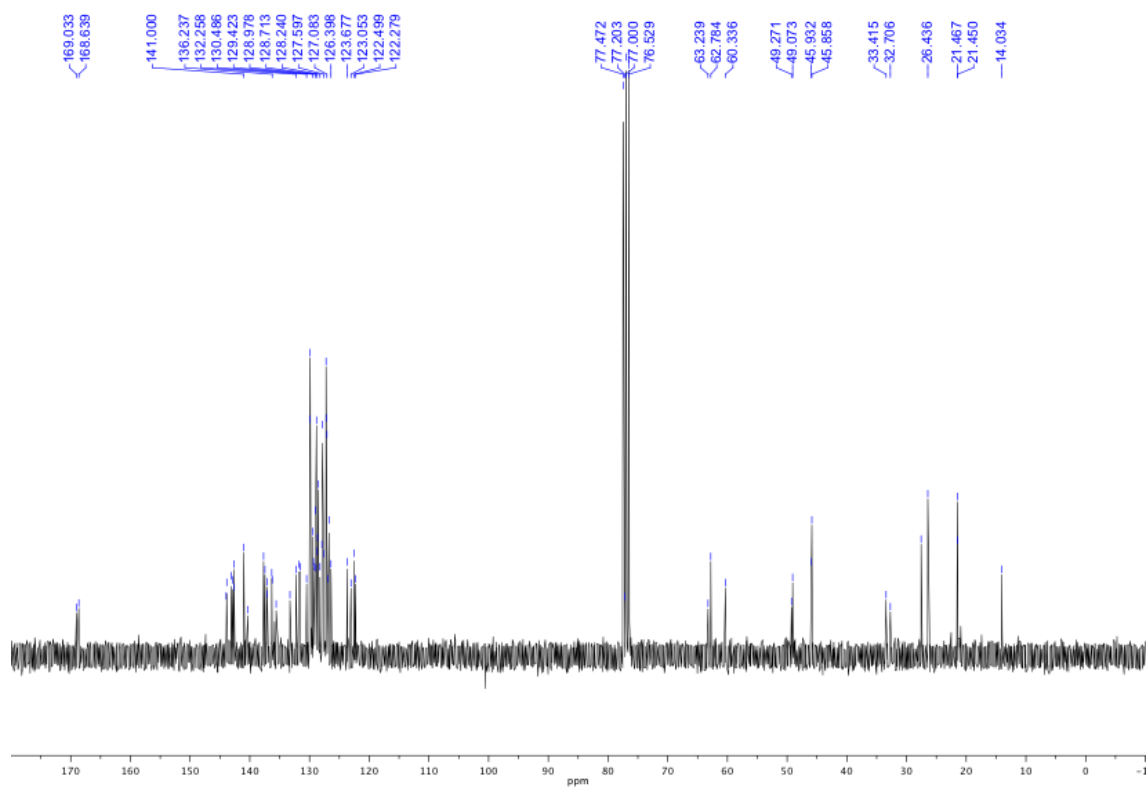

Supplement: c2cc32715e_2.pdf [file c2cc32715e_2.pdf]
